# Supplementary material for: Flux crystal growth: a versatile technique to reveal the crystal chemistry of complex uranium oxides
Source: Royal Society of Chemistry journal article supplement (doi:10.1039/c8dt04675a), 2019-01-01
Supplement: c8dt04675a1.xlsx [file c8dt04675a1.xlsx]

## Sheet: Sheet1
Compound	alkali uranate	alkaline uranate	RE	Ta	Nb	Cr	Mo	W	Mn	Fe	Ni	Cu	Zn	Cd	Tl	B	Pb	Si/Ge	Bi	P/As	Se/Te	mixed anion	Compound	Reagents	Flux	Dwell	Cool range	Color	Container	Wash	year	Journal
K2UO4	x																						K2UO4	U3O8	KOH	750	to 650 in 50 hours	orange-yellow	Silver Tube	MeOH	2010	Roof, I. P., Smith, M. D., zur Loye, H.-C., “Hydroxide Flux Growth of K2UO4 and Na4UO5”, J. Cryst. Growth, 2010, 312, 1240-1243.
Na4UO5	x																						Na4UO5	U3O8	NaOH	750	to 650 in 50 hours	orange-yellow	Silver Tube	MeOH	2010	Roof, I. P., Smith, M. D., zur Loye, H.-C., “Hydroxide Flux Growth of K2UO4 and Na4UO5”, J. Cryst. Growth, 2010, 312, 1240-1243.
Sr3UO6		x																					Sr3UO6	U3O8, SrCO3	K2CO3	1150	850 over 50 h	orange	Alumina Crucible	H2O	2010	Roof, I. P., Smith, M. D., zur Loye, H.-C., “High Temperature Flux Crystal Growth of Uranium-containing Perovskites: Sr3UO6 and Ba2MUO6 (M = Cu, Ni, Zn)”, J. Chem. Cryst., 2010, 40, 491-495.
Ba2CuUO6												x											Ba2CuUO6	U3O8, BaCO3 CuO	K2CO3	1050	850 over 50 h	brown	Alumina Crucible	H2O	2010	Roof, I. P., Smith, M. D., zur Loye, H.-C., “High Temperature Flux Crystal Growth of Uranium-containing Perovskites: Sr3UO6 and Ba2MUO6 (M = Cu, Ni, Zn)”, J. Chem. Cryst., 2010, 40, 491-495.
Ba2NiUO6											x												Ba2NiUO6	U3O8, BaCO3 NiO	K2CO3	1150	850 over 50 h	dark amber	Alumina Crucible	H2O	2010	Roof, I. P., Smith, M. D., zur Loye, H.-C., “High Temperature Flux Crystal Growth of Uranium-containing Perovskites: Sr3UO6 and Ba2MUO6 (M = Cu, Ni, Zn)”, J. Chem. Cryst., 2010, 40, 491-495.
Ba2ZnUO6													x										Ba2ZnUO6	U3O8, BaCO3 ZnO	K2CO3	1050	850 over 50 h	orange	Alumina Crucible	H2O	2010	Roof, I. P., Smith, M. D., zur Loye, H.-C., “High Temperature Flux Crystal Growth of Uranium-containing Perovskites: Sr3UO6 and Ba2MUO6 (M = Cu, Ni, Zn)”, J. Chem. Cryst., 2010, 40, 491-495.
Ba2Na0.83U1.17O6	x	x																					Ba2Na0.83U1.17O6	U3O8, BaCO3	Na2CO3	1050	800 at a rate of 15 C/h	orange	Alumina Crucible	H2O	2010	Roof, I. P., Smith, M. D., zur Loye, H.-C., Crystal Growth of Uranium-containing Complex Oxides: Ba2Na0.83U1.17O6, BaK4U3O12 and Na3Ca1.5UO6”, Solid State Sci., 2010, 12, 1941-1947.		Ba2Na0.83U1.17O6	U3O8, BaCO3	Na2CO3	1050 (24 hr)	to 800 in 16.67 hours	orange	Alumina	H2O		Roof, I. P., Smith, M. D., zur Loye, H.-C., “Crystal growth of uranium-containing complex oxides: Ba2Na0.83U1.17O6, BaK4U3O12 and Na3Ca1.5UO6”, Solid State Sci., 2010, 12, 1941-1947.
BaK4U3O12	x	x																					BaK4U3O12	U3O8 BaCO3	K2CO3	1050	800 at a rate of 15 C/h	orange	Alumina Crucible	H2O	2010	Roof, I. P., Smith, M. D., zur Loye, H.-C., Crystal Growth of Uranium-containing Complex Oxides: Ba2Na0.83U1.17O6, BaK4U3O12 and Na3Ca1.5UO6”, Solid State Sci., 2010, 12, 1941-1947.		BaK4U3O12	U3O8, NiO, BaCO3	K2CO3	1050 (24 hr)	to 850 in 10 hours	orange	Alumina	H2O		Roof, I. P., Smith, M. D., zur Loye, H.-C., “Crystal growth of uranium-containing complex oxides: Ba2Na0.83U1.17O6, BaK4U3O12 and Na3Ca1.5UO6”, Solid State Sci., 2010, 12, 1941-1947.
Na3Ca1.5UO6	x	x																					Na3Ca1.5UO6	U3O8 CaCO3	Na2CO3	1050	800 at a rate of 15 C/h	orange	Alumina Crucible	H2O	2010	Roof, I. P., Smith, M. D., zur Loye, H.-C., Crystal Growth of Uranium-containing Complex Oxides: Ba2Na0.83U1.17O6, BaK4U3O12 and Na3Ca1.5UO6”, Solid State Sci., 2010, 12, 1941-1947.		Na3Ca1.5UO6	U3O8, CaCO3	Na2CO3	1050 (24 hr)	to 800 in 16.67 hours	orange	Alumina	H2O		Roof, I. P., Smith, M. D., zur Loye, H.-C., “Crystal growth of uranium-containing complex oxides: Ba2Na0.83U1.17O6, BaK4U3O12 and Na3Ca1.5UO6”, Solid State Sci., 2010, 12, 1941-1947.
CaUO4		x																					CaUO4	UO2 CaCO3	K2CO3	900 in N2	800 at a rate of 5 C/h	Amber	Alumina Crucible	H2O	2013	Read, C. M., Bugaris, D. E., zur Loye, H.-C., “Single Crystal Growth and Structural Characterization of Four Complex Uranium Oxides: CaUO4, b-Ca3UO6, K4CaU3O12, and K4SrU3O12”, Solid State Sci., 2013, 17, 40-45.
b-Ca3UO6		x																					b-Ca3UO6	UO2 CaCO3	K2CO3	900 in N2	800 at a rate of 5 C/h	yellow	Alumina Crucible	H2O	2013	Read, C. M., Bugaris, D. E., zur Loye, H.-C., “Single Crystal Growth and Structural Characterization of Four Complex Uranium Oxides: CaUO4, b-Ca3UO6, K4CaU3O12, and K4SrU3O12”, Solid State Sci., 2013, 17, 40-45.		𝛽-Ca3UO6	UO2, CaCO3	K2CO3	900 (48 hr)	naturally cooled to RT	yellow	Alumina	H2O		Read, C. M., Bugaris, D. E., zur Loye, H.-C., “Single crystal growth and structural characterization of four complex uranium oxides: CaUO4, β-Ca3UO6, K4CaU3O12, and K4SrU3O12”, Solid State Sci., 2013, 17, 40-45.
K4CaU3O12		x																					K4CaU3O12	U3O8 CaCO3	K2CO3	1050	800 at a rate of 5 C/h	orange	Alumina Crucible	H2O	2013	Read, C. M., Bugaris, D. E., zur Loye, H.-C., “Single Crystal Growth and Structural Characterization of Four Complex Uranium Oxides: CaUO4, b-Ca3UO6, K4CaU3O12, and K4SrU3O12”, Solid State Sci., 2013, 17, 40-45.		CaUO4	UO2, CaCO3	K2CO3	900 (48 hr)	naturally cooled to RT	amber	Alumina	H2O		Read, C. M., Bugaris, D. E., zur Loye, H.-C., “Single crystal growth and structural characterization of four complex uranium oxides: CaUO4, β-Ca3UO6, K4CaU3O12, and K4SrU3O12”, Solid State Sci., 2013, 17, 40-45.
K4SrU3O12		x																					K4SrU3O12	U3O8 SrCO3	K2CO3	1050	800 at a rate of 5 C/h	orange	Alumina Crucible	H2O	2013	Read, C. M., Bugaris, D. E., zur Loye, H.-C., “Single Crystal Growth and Structural Characterization of Four Complex Uranium Oxides: CaUO4, b-Ca3UO6, K4CaU3O12, and K4SrU3O12”, Solid State Sci., 2013, 17, 40-45.		K4CaU3O12	UO2, CaCO3	K2CO3	900 (48 hr)	naturally cooled to RT	orange	Alumina	H2O		Read, C. M., Bugaris, D. E., zur Loye, H.-C., “Single crystal growth and structural characterization of four complex uranium oxides: CaUO4, β-Ca3UO6, K4CaU3O12, and K4SrU3O12”, Solid State Sci., 2013, 17, 40-45.
Na4.5Nd0.5UO6			x																				Na4.5Nd0.5UO6	U3O8 Nd2O3	NaOH/KOH eu	700	600 at a rate of 15 C/h	orange	Alumina Crucible	MeOH	2013	Read, C. M., Smith, M. D., zur Loye, H.-C., “Synthesis and Crystal Structure of a New Complex Uranium Oxide, Na4.5Nd.5UO6”, J. Chem. Cryst., 2013, 43, 484-487		K4SrU3O12	U3O8, SrCO3	K2CO3	1050 (24 hr)	to 800 in 50 hours	orange	Alumina	H2O		Read, C. M., Bugaris, D. E., zur Loye, H.-C., “Single crystal growth and structural characterization of four complex uranium oxides: CaUO4, β-Ca3UO6, K4CaU3O12, and K4SrU3O12”, Solid State Sci., 2013, 17, 40-45.
K4U5O16Cl2																						x	K4U5O16Cl2	UO3 KCl	KCl	900	550 at a rate of 6 C/h	orange	SiO2 tube vac	H2O	2013	Read, C. M., Yeon, J., Smith, M. D., zur Loye, H.-C., “Crystal Growth, Structural Characterization, and Optical Properties of Uranium(VI) Containing Oxychlorides, A4U5O16Cl2 (A = K, Rb), Cs5U7O22Cl3, and AUO3Cl (A = Rb, Cs)”, , DOI:10.1039/c4ce00281d. Cryst. Eng. Comm., 2014, 16, 7259-7267.		Na4.5Nd0.5UO6	U3O8, Nd2O3	NaOH/KOH	700 (24 hr)	to 600 in 6.67 hours	orange	Alumina	MeOH		Read, C. M., Smith, M. D., zur Loye, H.-C., “Synthesis and Crystal Structure of a New Complex Uranium Oxide, Na4.5Nd0.5UO6”, J. Chem. Crystallogr., 2013, 43, 484-487.
Rb4U5O16Cl2																						x	Rb4U5O16Cl2	UO3 RbCl	RbCl	900	550 at a rate of 6 C/h	orange	SiO2 tube vac	H2O	2014	Read, C. M., Yeon, J., Smith, M. D., zur Loye, H.-C., “Crystal Growth, Structural Characterization, and Optical Properties of Uranium(VI) Containing Oxychlorides, A4U5O16Cl2 (A = K, Rb), Cs5U7O22Cl3, and AUO3Cl (A = Rb, Cs)”, , DOI:10.1039/c4ce00281d. Cryst. Eng. Comm., 2014, 16, 7259-7267.
Cs5U7O22Cl3																						x	Cs5U7O22Cl3	U3O8 CsCl	CsCl	900	550 at a rate of 6 C/h	orange	Alumina Crucible	H2O	2014	Read, C. M., Yeon, J., Smith, M. D., zur Loye, H.-C., “Crystal Growth, Structural Characterization, and Optical Properties of Uranium(VI) Containing Oxychlorides, A4U5O16Cl2 (A = K, Rb), Cs5U7O22Cl3, and AUO3Cl (A = Rb, Cs)”, , DOI:10.1039/c4ce00281d. Cryst. Eng. Comm., 2014, 16, 7259-7267.
RbUO3Cl																						x	RbUO3Cl	UO3 RbCl	RbCl	900	550 at a rate of 6 C/h	yellow	SiO2 tube vac	H2O	2014	Read, C. M., Yeon, J., Smith, M. D., zur Loye, H.-C., “Crystal Growth, Structural Characterization, and Optical Properties of Uranium(VI) Containing Oxychlorides, A4U5O16Cl2 (A = K, Rb), Cs5U7O22Cl3, and AUO3Cl (A = Rb, Cs)”, , DOI:10.1039/c4ce00281d. Cryst. Eng. Comm., 2014, 16, 7259-7267.
CsUO3Cl																						x	CsUO3Cl	UO3 CsCl	CsCl	900	550 at a rate of 6 C/h	yellow	SiO2 tube vac	H2O	2014	Read, C. M., Yeon, J., Smith, M. D., zur Loye, H.-C., “Crystal Growth, Structural Characterization, and Optical Properties of Uranium(VI) Containing Oxychlorides, A4U5O16Cl2 (A = K, Rb), Cs5U7O22Cl3, and AUO3Cl (A = Rb, Cs)”, , DOI:10.1039/c4ce00281d. Cryst. Eng. Comm., 2014, 16, 7259-7267.
MnUO4									x														MnUO4	U3O8 MnCl2•4H2O	CsCl	900	550 at a rate of 6 C/h	black	Alumina Crucible	H2O	2014	Read, C. M., Smith, M. D., zur Loye, H.-C., “Single Crystal Growth and Structural Characterization of Ternary Transition-Metal Uranium Oxides: MnUO4, FeUO4, and NiU2O6”, Solid State Sci., 2014, 37, 136-143.
FeUO4										x													FeUO4	U3O8 FeCl2•4H2O	BaCl2	1050	850 at a rate of 3 C/h	black	Alumina Crucible	H2O	2014	Read, C. M., Smith, M. D., zur Loye, H.-C., “Single Crystal Growth and Structural Characterization of Ternary Transition-Metal Uranium Oxides: MnUO4, FeUO4, and NiU2O6”, Solid State Sci., 2014, 37, 136-143.
NiU2O6											x												NiU2O6	U3O8 NiCl2•4H2O	KCl	900	700 at a rate of 6 C/h	black	U3O8 MnCl2•4H2O	H2O	2014	Read, C. M., Smith, M. D., zur Loye, H.-C., “Single Crystal Growth and Structural Characterization of Ternary Transition-Metal Uranium Oxides: MnUO4, FeUO4, and NiU2O6”, Solid State Sci., 2014, 37, 136-143.
K8U7O24	x																						K8U7O24	UO2 UO3 CaO	KF	950	750 at a rate of 6 C/h	back	copper tube	H2O	2014	Read, C. M., Smith, D. M., zur Loye, H.-C., “Single Crystal Growth and Structural Characterization of a Novel Mixed-Valent Ternary Uranium Oxide, K8U7O24”, DOI:10.1007/s10870-014-0555-x. J. Chem. Cryst., 2014, 44, 604-608.
Cs2.2U5O16	x																						Cs2.2U5O16	UO3	CsCl	870	quenched after 6 day dwell	yellow	SiO2 tube vac	H2O	2015	Morrison, G., Read, C. M., Smith, M. D., zur Loye, H.-C., “Flux Crystal Growth and Structural Analysis of Two Cesium Uranium Oxides, Cs2.2U5O16 and Cs2U4O13, Containing Multiple Cation-Cation Interactions”, DOI:10.1039/c4ce02430c CrystEngComm,. 2015, 17, 1968-1974.		Cs2.2U5O16	UO3	CsCl	600; slowly heated to 940 in 6.8 hr (13 hr dwell)	naturally cooled to RT	brown	Alumina	H2O		Morrison, G., Read, C. M., Smith, M. D., Loye, H.-C. Z., “Flux crystal growth and structural analysis of two cesium uranium oxides, Cs2.2U5O16 and Cs2U4O13, containing multiple cation–cation interactions”, CrystEngComm, 2015, 17, 1968-1974.
Cs2U4O13	x																						Cs2U4O13	UO3	CsCl	870	quenched after 6 day dwell	red	SiO2 tube vac	H2O	2015	Morrison, G., Read, C. M., Smith, M. D., zur Loye, H.-C., “Flux Crystal Growth and Structural Analysis of Two Cesium Uranium Oxides, Cs2.2U5O16 and Cs2U4O13, Containing Multiple Cation-Cation Interactions”, DOI:10.1039/c4ce02430c CrystEngComm,. 2015, 17, 1968-1974.		Cs2U4O13	UO3	CsCl	870 (6 d)	naturally cooled to RT	orange-red	Silica	H2O		Morrison, G., Read, C. M., Smith, M. D., Loye, H.-C. Z., “Flux crystal growth and structural analysis of two cesium uranium oxides, Cs2.2U5O16 and Cs2U4O13, containing multiple cation–cation interactions”, CrystEngComm, 2015, 17, 1968-1974.
Rb2USiO6																		x					Rb2USiO6	U3O8 SiO2	RbF	900	700 at a rate of 6 C/h	orange	Silver Crucible	H2O	2015	Read, C. M., Smith, M. D., Withers, R., zur Loye, H.-C., “Flux Crystal Growth and Optical Properties of Two Uranium-Containing Silicates: A2USiO6 (A = Cs, Rb)”, DOI:10.1021/acs.inorgchem.5b00364. Inorg. Chem., 2015, 54, 4520–4525		Cs2SiUO6	U3O8, SiO2	CsF	900 (12 hr)	to 700 in 33.3 hours	orange	Slver	H2O		Read, C. M., Smith, M. D., Withers, R., zur Loye, H.-C., “Flux Crystal Growth and Optical Properties of Two Uranium-Containing Silicates: A2USiO6 (= Cs, Rb)”, Inorg. Chem., 2015, 54, 4520-4525.
Cs2USiO6																		x					Cs2USiO6	U3O8 SiO2	CsF	900	700 at a rate of 6 C/h	orange	Silver Crucible	H2O	2015	Read, C. M., Smith, M. D., Withers, R., zur Loye, H.-C., “Flux Crystal Growth and Optical Properties of Two Uranium-Containing Silicates: A2USiO6 (A = Cs, Rb)”, DOI:10.1021/acs.inorgchem.5b00364. Inorg. Chem., 2015, 54, 4520–4525		Rb2SiUO6	U3O8, SiO2	RbF	900 (12 hr)	to 700 in 33.3 hours	orange	Silver	H2O		Read, C. M., Smith, M. D., Withers, R., zur Loye, H.-C., “Flux Crystal Growth and Optical Properties of Two Uranium-Containing Silicates: A2USiO6 (= Cs, Rb)”, Inorg. Chem., 2015, 54, 4520-4525.
Cs2Mn3U6O22									x														Cs2Mn3U6O22	U3O8 MnCl2•4H2O	CsCl	900	quenched after 9 h dwell	orange	Alumina Crucible	H2O	2015	Read, C. M., Gordon, E. E., Smith, M. D., Yeon, J., Morrison, G., Whangbo, M.-H., zur Loye, H.-C., “Synthesis of the Layered Quaternary Uranium Containing Oxide Cs2Mn3U6O22 and Characterization of its Magnetic Properties”, DOI:10.1021/acs.inorgchem.5b00552. Inorg. Chem., 2015, 54, 5495-5503
K4CaUSi4O14																		x					K4CaUSi4O14	U3O8 SiO2	KF/CaF2 eu	900	700 at a rate of 6 C/h	yellow	Silver Crucible	H2O	2015	Morrison, G., Smith, M. D., Tran, T. T., Halasyamani, P. S., zur Loye, H.-C., “Synthesis and Structure of the New Pentanary Uranium (VI) Silicate, K4CaUSi4O14, a Member of a Structural Family Related to Fresnoite”, DOI: 10.1039/C5CE00504C. CrystEngComm, 2015, 17, 4218–4224.		K4CaUSi4O14	U3O8, SiO2	KF/CaF2	900 (12 hr)	to 700 in 33.3 hours	yellow	Silver	H2O		Morrison, G., Smith, M. D., Tran, T. T., Halasyamani, P. S., zur Loye, H.-C., “Synthesis and structure of the new pentanary uranium(VI) silicate, K4CaUSi4O14, a member of a structural family related to fresnoite”, CrystEngComm, 2015, 17, 4218-4224.
K2USi6O15																		x					K2USi6O15	UO2 SiO2	KF/KCl eu	900	700 at a rate of 2 C/h	light green	Copper tube	H2O	2015	Morrison, G., Ramanantoanina, H., Urland, W., Smith, M. D., zur Loye, H.-C., Inorg. Chem., 2015, 54, 5504-5511
Rb2USi6O15																		x					Rb2USi6O15	UO2 SiO2	RbF/RbCl eu	900	500 at a rate of 6 C/h	light green	Copper tube	H2O	2015	Morrison, G., Ramanantoanina, H., Urland, W., Smith, M. D., zur Loye, H.-C., Inorg. Chem., 2015, 54, 5504-5511
Cs2USi6O15																		x					Cs2USi6O15	UO2 SiO2	CsF/CsCl eu	900	400 at a rate of 6 C/h	light green	Copper tube	H2O	2015	Morrison, G., Ramanantoanina, H., Urland, W., Smith, M. D., zur Loye, H.-C., Inorg. Chem., 2015, 54, 5504-5511
K2MnU3O11									x														K2MnU3O11	U3O8 MnCl2•4H2O	KCl	900	500 at a rate of 6 C/h	red	Alumina Crucible	H2O	2015	Read, C. M., Morrison, G., Yeon, J., Smith, M. D., zur Loye, H.-C., “A2MnU3O11 (A = K, Rb) and Li3.2Mn1.8U6O22: Three New Alkali-Metal Manganese Uranium(VI) Oxides Related to Natrotantite”, DOI:10.1021/acs.inorgchem.5b01004. Inorg. Chem., 2015, 54, 6993-6999.		K2MnU3O11	U3O8, MnCl2∙4H2O	KCl	900 (12 hr)	naturally cooled to RT	red-orange	Alumina	H2O	2015	Read, C. M., Morrison, G., Yeon, J., Smith, M. D., zur Loye, H.-C., "A2MnU3O11 (A = K, Rb) and Li3.2Mn1.8U6O22: Three New Alkali-Metal Manganese Uranium(VI) Oxides Related to Natrotantite", Inorg. Chem.,2015, 54, 6993-6999.
Rb2MnU3O11									x														Rb2MnU3O11	U3O8 MnCl2•4H2O	RbCl	950	500 at a rate of 6 C/h	red	Alumina Crucible	H2O	2015	Read, C. M., Morrison, G., Yeon, J., Smith, M. D., zur Loye, H.-C., “A2MnU3O11 (A = K, Rb) and Li3.2Mn1.8U6O22: Three New Alkali-Metal Manganese Uranium(VI) Oxides Related to Natrotantite”, DOI:10.1021/acs.inorgchem.5b01004. Inorg. Chem., 2015, 54, 6993-6999.		Rb2MnU3O11	U3O8, MnCl2∙4H2O	RbCl	950 (12 hr)	naturally cooled to RT	red-orange	Alumina	H2O	2015	Read, C. M., Morrison, G., Yeon, J., Smith, M. D., zur Loye, H.-C., "A2MnU3O11 (A = K, Rb) and Li3.2Mn1.8U6O22: Three New Alkali-Metal Manganese Uranium(VI) Oxides Related to Natrotantite", Inorg. Chem.,2015, 54, 6993-6999.
Li3.2Mn1.8U6O22									x														Li3.2Mn1.8U6O22	U3O8 MnCl2•4H2O	LiCl	900	500 at a rate of 6 C/h	red	Alumina Crucible	H2O	2015	Read, C. M., Morrison, G., Yeon, J., Smith, M. D., zur Loye, H.-C., “A2MnU3O11 (A = K, Rb) and Li3.2Mn1.8U6O22: Three New Alkali-Metal Manganese Uranium(VI) Oxides Related to Natrotantite”, DOI:10.1021/acs.inorgchem.5b01004. Inorg. Chem., 2015, 54, 6993-6999.		Li3.2Mn1.8U6O22	U3O8, MnCl2∙4H2O	LiCl	900 (12 hr)	to 500 in 66.67 hours	yellow-brown	Alumina	H2O	2015	Read, C. M., Morrison, G., Yeon, J., Smith, M. D., zur Loye, H.-C., "A2MnU3O11 (A = K, Rb) and Li3.2Mn1.8U6O22: Three New Alkali-Metal Manganese Uranium(VI) Oxides Related to Natrotantite", Inorg. Chem.,2015, 54, 6993-6999.
KUO3Cl																						x	KUO3Cl	U3O8 CoCl2•6H2O	KCl	900	550 at a rate of 6 C/h	yellow	Alumina Crucible	H2O	2015	Read, C. M., Smith, D. M., zur Loye, H.-C., “Synthesis, Crystal Structure, and Optical Properties of a New Complex Uranium Oxychloride, KUO3Cl”, DOI:10.1007/s10870-015-0612-0. J. Chem. Cryst. 2015, 45, 440-444.
[NaK6F][(UO2)3(Si2O7)2]																		x					[NaK6F][(UO2)3(Si2O7)2]	U3O8 SiO2	KF/NaF eu	900	600 at a rate of 6 C/h	yellow	Silver Crucible	H2O	2015	Morrison, G., zur Loye, H.-C., “Flux Growth of [NaK6F][(UO2)3(Si2O7)2] and [KK6Cl][(UO2)3(Si2O7)2]: The Effect of Surface Area to Volume Ratios on Reaction Products”, DOI:10.1021/acs.cgd.5b01408. Cryst. Growth Design, 2016, 16, 1294-1299.
[KK6Cl][(UO2)3(Si2O7)2]																		x					[KK6Cl][(UO2)3(Si2O7)2]	U3O8 SiO2	KF/NaF eu	900	600 at a rate of 6 C/h	yellow	Silver Crucible	H2O	2016	Morrison, G., zur Loye, H.-C., “Flux Growth of [NaK6F][(UO2)3(Si2O7)2] and [KK6Cl][(UO2)3(Si2O7)2]: The Effect of Surface Area to Volume Ratios on Reaction Products”, DOI:10.1021/acs.cgd.5b01408. Cryst. Growth Design, 2016, 16, 1294-1299.
K8(K5F)U6Si8O40																		x					K8(K5F)U6Si8O40	U3O8 SiO2	KF/KBr	800	500 at a rate of 6 C/h	light yellow	Silver Crucible	H2O	2016	Morrison, G., Tran, T. T., Halasyamani, P. S., zur Loye, H.-C., “K8(K5F)U6Si8O40: An Intergrowth Uranyl Silicate”, DOI:10.1021/acs.inorgchem.6b00242. Inorg. Chem., 2016, 55, 3215-3217.		K8(K5F)U6Si8O40	U3O8, SiO2	KF/KBr	800 (12 hr)	to 500 in 50 hours	orange	Silver	H2O		Morrison, G., Tran, T. T., Halasyamani, P. S., zur Loye, H.-C., “K8(K5F)U6Si8O40: An Intergrowth Uranyl Silicate”, Inorg. Chem., 2016, 55, 3215-3217.
Cs2USi2O8																		x					Cs2USi2O8	UF4 SiO2	CsCl	800	400 at a rate of 6 C/h	yellow	Silver Tube	H2O	2016	Morrison, G., Smith, M. D., zur Loye, H.-C., “Understanding the Formation of Salt-Inclusion Phases: An Enhanced Flux Growth Method for the Targeted Synthesis of Salt-Inclusion Cesium Halide Uranyl Silicates”, DOI:10.1021/jacs.6b03205. J. Am. Chem. Soc., 2016, 138, 7121-7129.
[Cs3F][(UO2)(Si4O10)]																		x					[Cs3F][(UO2)(Si4O10)]	UF4 SiO2	CsCl	800	400 at a rate of 6 C/h	yellow green	Silver Tube	H2O	2016	Morrison, G., Smith, M. D., zur Loye, H.-C., “Understanding the Formation of Salt-Inclusion Phases: An Enhanced Flux Growth Method for the Targeted Synthesis of Salt-Inclusion Cesium Halide Uranyl Silicates”, DOI:10.1021/jacs.6b03205. J. Am. Chem. Soc., 2016, 138, 7121-7129.
[Cs2Cs5F][(UO2)3(Si2O7)2]																		x					[Cs2Cs5F][(UO2)3(Si2O7)2]	UF4 SiO2	CsCl	800	400 at a rate of 6 C/h	yellow	Silver Tube	H2O	2016	Morrison, G., Smith, M. D., zur Loye, H.-C., “Understanding the Formation of Salt-Inclusion Phases: An Enhanced Flux Growth Method for the Targeted Synthesis of Salt-Inclusion Cesium Halide Uranyl Silicates”, DOI:10.1021/jacs.6b03205. J. Am. Chem. Soc., 2016, 138, 7121-7129.
[Cs2Cs5F][(UO2)2(Si6O17)]																		x					[Cs2Cs5F][(UO2)2(Si6O17)]	UO2 SiO2	CsCl	800	400 at a rate of 6 C/h	yellow	Silver Tube	H2O	2016	Morrison, G., Smith, M. D., zur Loye, H.-C., “Understanding the Formation of Salt-Inclusion Phases: An Enhanced Flux Growth Method for the Targeted Synthesis of Salt-Inclusion Cesium Halide Uranyl Silicates”, DOI:10.1021/jacs.6b03205. J. Am. Chem. Soc., 2016, 138, 7121-7129.
[Cs9Cs6Cl][(UO2)7(Si6O17)2(Si4O12)]																		x					[Cs9Cs6Cl][(UO2)7(Si6O17)2(Si4O12)]	UF4 SiO2	CsCl	800	400 at a rate of 6 C/h	yellow	Silver Tube	H2O	2016	Morrison, G., Smith, M. D., zur Loye, H.-C., “Understanding the Formation of Salt-Inclusion Phases: An Enhanced Flux Growth Method for the Targeted Synthesis of Salt-Inclusion Cesium Halide Uranyl Silicates”, DOI:10.1021/jacs.6b03205. J. Am. Chem. Soc., 2016, 138, 7121-7129.
Rb2(UO2)Si2O6																		x					Rb2(UO2)Si2O6	UF4 SiO2	RbF/RbCl eu	800	400 at a rate of 6 C/h	yellow	Silver Crucible	H2O	2017	Morrison, G., Smith, M. D., zur Loye, H.-C., “Flux versus Hydrothermal Growth: Polymorphism of A2(UO2)Si2O6 (A = Rb, Cs)”, DOI:10.1021/acs.inorgchem.6b02931. Inorg. Chem., 2017, 56, 1053-1056.
Cs2(UO2)Si2O6																		x					Cs2(UO2)Si2O6	UF4 SiO2	CsF/CsCl eu	800	400 at a rate of 6 C/h	yellow	Silver Crucible	H2O	2017	Morrison, G., Smith, M. D., zur Loye, H.-C., “Flux versus Hydrothermal Growth: Polymorphism of A2(UO2)Si2O6 (A = Rb, Cs)”, DOI:10.1021/acs.inorgchem.6b02931. Inorg. Chem., 2017, 56, 1053-1056.
Rb6[(UO2)7O4(PO4)4]																				x			Rb6[(UO2)7O4(PO4)4]	UF4 AlPO4	RbCl	875	450 at a rate of 6 C/h	orange	Alumina Crucible	H2O	2018	Juillerat, C. A., Moore, E. E., Besmann, T. M., zur Loye, H.-C., “Observation of an Unusual Uranyl Cation-Cation Interaction in the Strongly Fluorescent Layered Uranyl Phosphates Rb6[(UO2)7O4(PO4)4] and Cs6[(UO2)7O4(PO4)4]”, DOI:10.1021/acs.inorgchem.8b00302. Inorg. Chem., 2018, 57, 3675–3678.
Cs6[(UO2)7O4(PO4)4]																				x			Cs6[(UO2)7O4(PO4)4]	UF4 AlPO4	CsCl	875	450 at a rate of 6 C/h	orange	Alumina Crucible	H2O	2018	Juillerat, C. A., Moore, E. E., Besmann, T. M., zur Loye, H.-C., “Observation of an Unusual Uranyl Cation-Cation Interaction in the Strongly Fluorescent Layered Uranyl Phosphates Rb6[(UO2)7O4(PO4)4] and Cs6[(UO2)7O4(PO4)4]”, DOI:10.1021/acs.inorgchem.8b00302. Inorg. Chem., 2018, 57, 3675–3678.
A4(PO4)2[(UO2)3O2]																				x			A4(PO4)2[(UO2)3O2]	UF4 AlPO4	Acl	875	450 at a rate of 6 C/h	yellow	Alumina Crucible	H2O	2018	Juillerat, C. A., Moore, E. E., Kocevski, V., Besmann, T. M., zur Loye, H.-C., “A Family of Layered Phosphates Crystallizing in a Rare Geometrical Isomer of the Phosphuranylite Topology: Synthesis, Characterization, and Computational Modeling of A4(PO4)2[(UO2)3O2] (A = alkali metals) Exhibiting Intra-layer Ion Exchange”, DOI:10.1021/acs.inorgchem.8b00434. Inorg. Chem., 2018, 57, 4726-4738.
K4[(UO2)5(TeO3)2O5]																					x		K4[(UO2)5(TeO3)2O5]	UO3 TeO3	KCl	800	RT?	yellow	alumina	water?	2005	Woodward J.D.,Albrecht Schmitt T.E. Journal: Journal of Solid State Chemistry Year: 2005 Volume: 178 Number: Pages: 2922-2926
Rb2U2MoO10							x																Rb2U2MoO10	RbNO3 UO3	MoO3	1000	1000-RT	yellow-green	platinum	?	2007	Alekseev E.V.,Suleimanov E.V.,Chuprunov E.V.,Golubev A.V.,Fukin G.K.,Marychev M.O. Journal: Zhurnal Neorganicheskoi Khimii Year: 2007 Volume: 52 Number: Pages: 1446-1449
Rb4U5O17	x																						Rb4U5O17	RbNO3 U3O8	Sb2O5	1300	1300-RT	yellow	platinum	?	2009	Saad S.,Obbade S.,Renard C.,Abraham F. Journal: Journal of Alloys Compd. Year: 2009 Volume: 474 Number: Pages: 68-72
Ag6[(UO2)2(As2O7)(As4O13)]																				x			Ag6[(UO2)2(As2O7)(As4O13)]	AgNO3 UO2(NO3)2	As2O5	780	780-5	greenish-yellow	platinum	?	2009	Alekseev E.V.,Krivovichev S.V.,Depmeier W. Journal: Journal of Materials Chemistry Year: 2009 Volume: 19 Number: Pages: 2583-2587
Ag6[(UO2)2(AsO4)2(As2O7)]																				x			Ag6[(UO2)2(AsO4)2(As2O7)]	AgNO3 UO2(NO3)2	As2O5	780	780-5	greenish-yellow	platinum	?	2009	Alekseev E.V.,Krivovichev S.V.,Depmeier W. Journal: Journal of Materials Chemistry Year: 2009 Volume: 19 Number: Pages: 2583-2587
Na6[(UO2)2(AsO4)2(As2O7)]																				x			Na6[(UO2)2(AsO4)2(As2O7)]	NaNO3 UO2(NO3)2	As2O5	780	780-5	greenish-yellow	platinum	?	2009	Alekseev E.V.,Krivovichev S.V.,Depmeier W. Journal: Journal of Materials Chemistry Year: 2009 Volume: 19 Number: Pages: 2583-2587
Li6((UO2)12(PO4)8(P4O13))																				x			Li6((UO2)12(PO4)8(P4O13))	UO2(NO3)2 LiCO3	P2O5	820	820-50	dark orange	platinum	?	2009	Alekseev E.V.,Krivovichev S.V.,Depmeier W. Journal: Journal of Solid State Chemistry Year: 2009 Volume: 182 Number: Pages: 2977-2984
Li5((UO2)13(AsO4)9(As2O7))																				x			Li5((UO2)13(AsO4)9(As2O7))	UO2(NO3)2 LiCO3	As2O5	820	820-50	dark orange	platinum	?	2009	Alekseev E.V.,Krivovichev S.V.,Depmeier W. Journal: Journal of Solid State Chemistry Year: 2009 Volume: 182 Number: Pages: 2977-2984
Li((UO2)4(AsO4)3)																				x			Li((UO2)4(AsO4)3)	UO2(NO3)2 LiCO3	As2O5	820	820-50	dark orange	platinum	?	2009	Alekseev E.V.,Krivovichev S.V.,Depmeier W. Journal: Journal of Solid State Chemistry Year: 2009 Volume: 182 Number: Pages: 2977-2984
Li3((UO2)7(AsO4)5O)																				x			Li3((UO2)7(AsO4)5O)	UO2(NO3)2 LiCO3	As2O5	820	820-50	dark orange	platinum	?	2009	Alekseev E.V.,Krivovichev S.V.,Depmeier W. Journal: Journal of Solid State Chemistry Year: 2009 Volume: 182 Number: Pages: 2977-2984
Bi2(W0.7U0.3)O6								x											x				Bi2(W0.7U0.3)O6	BiO3 MoO3 UO2 U3O8	K2SO4/NaSO4	1000	1000-750	?	alumina	?	2010	Charkin D.O.,Lebedev D.N.,Stefanovich S.Yu.,Kazakov S.M. Journal: SOLID STATE SCIENCES Year: 2010 Volume: 12 Number: Pages: 2079-2085
Bi2(W0.4U0.6)O6								x											x				Bi2(W0.4U0.6)O6	BiO3 MoO3 UO2 U3O8	K2SO4/NaSO4	1000	1000-750	?	alumina	?	2010	Charkin D.O.,Lebedev D.N.,Stefanovich S.Yu.,Kazakov S.M. Journal: SOLID STATE SCIENCES Year: 2010 Volume: 12 Number: Pages: 2079-2085
Ba4((UO2)2(As2O7)3)																				x			Ba4((UO2)2(As2O7)3)	Ba(NO3)2 UO2(NO3)2	As2O5	850	850-50	green-yellow	Pt crucibles	?	2011	Alekseev E.V.,Krivovichev S.V.,Depmeier W. Journal: Crystal Growth and Design Year: 2011 Volume: 2011 Number: Pages: 3295-3300
Ba3((UO2)2(AsO4)2(As2O7))																				x			Ba3((UO2)2(AsO4)2(As2O7))	Ba(NO3)2 UO2(NO3)2	As2O5	850	850-50	green-yellow	Pt crucibles	?	2011	Alekseev E.V.,Krivovichev S.V.,Depmeier W. Journal: Crystal Growth and Design Year: 2011 Volume: 2011 Number: Pages: 3295-3300
Ba5Ca((UO2)8(AsO4)4O8)								x															Ba5Ca((UO2)8(AsO4)4O8)	CaCO3 Ba(NO3) UO2(NO3)2	As2O5	1150	1150-50	green-yellow	platinum	?	2011	Alekseev E.V.,Krivovichev S.V.,Depmeier W. Journal: Crystal Growth and Design Year: 2011 Volume: 2011 Number: Pages: 3295-3300
Rb8((UO2)4(WO4)4(WO5)2)								x															Rb8((UO2)4(WO4)4(WO5)2)	UO2(CH3COO)2 WO3	Rb2CO3	920	920-250		platinum	?	2006	Alekseev E.V.,Krivovichev S.V.,Depmeier W.,Armbruster T.,Katzke H.,Suleimanov E.V.,Chuprunov E.V. Journal: Journal of Solid State Chemistry Year: 2006 Volume: 179 Number: Pages: 2977-2987
Cs8((UO2)4(WO4)4(WO5)2)								x															Cs8((UO2)4(WO4)4(WO5)2)	UO2(CH3COO)2 WO3	Cs2CO3	920	920-250		platinum	?	2006	Alekseev E.V.,Krivovichev S.V.,Depmeier W.,Armbruster T.,Katzke H.,Suleimanov E.V.,Chuprunov E.V. Journal: Journal of Solid State Chemistry Year: 2006 Volume: 179 Number: Pages: 2977-2987
Rb6((UO2)2O(WO4)4)								x															Rb6((UO2)2O(WO4)4)	UO2(CH3COO)2 WO3	RbCO3	920	920-250	yellow	platinum	?	2006	Alekseev E.V.,Krivovichev S.V.,Depmeier W.,Armbruster T.,Katzke H.,Suleimanov E.V.,Chuprunov E.V. Journal: Journal of Solid State Chemistry Year: 2006 Volume: 179 Number: Pages: 2977-2987
K2((UO2)As2O7)																				x			K2((UO2)As2O7)	UO2(NO3)2 K2CO3	As2O5	800	800-60	yellow	platinum	?	2007	Alekseev E.S.,Krivovichev S.V.,Depmeier W. Journal: Zeitschrift fuer Anorganische und Allgemeine Chemie Year: 2007 Volume: 633 Number: Pages: 1125-1126
Cs2((UO2)O(MoO4))							x																Cs2((UO2)O(MoO4))	UO2(CH3COO)2 MoO3	CsCO3	870	870-50	?	platinum	?	207	Alekseev E.V.,Krivovichev S.V.,Armbruster T.,Depmeier W.,Suleimanov E.V.,Chuprunov E.V.,Golubeva A.V. Journal: Zeitschrift fuer Anorganische und Allgemeine Chemie Year: 2007 Volume: 633 Number: Pages: 1979-1984
Li4((UO2)2(W2O10))								x															Li4((UO2)2(W2O10))	UO2(CH3COO)2 WO3	Li2CO3	920	920-250	red-orange	platinum	?	2007	Alekseev E.V.,Krivovichev S.V.,Depmeier W.,Malcherek T.,Suleimanov E.V.,Chuprunov E.V. Journal: Zeitschrift fuer Kristallographie - New Crystal Structures Year: 2007 Volume: 222 Number: Pages: 391-395
Li((UO2)(PO4))																				x			Li((UO2)(PO4))	UO2(NO3)2 Li2CO3	P2O5	820	820-50	green-yellow	platinum	?	2008	Alekseev E.V.,Krivovichev S.V.,Malcherek T.,Depmeier W. Journal: Journal of Solid State Chemistry Year: 2008 Volume: 181 Number: Pages: 3010-3015
Li((UO2)(AsO4))																				x			Li((UO2)(AsO4))	UO2(NO3)2 Li2CO3	As2O5	820	820-50	green-yellow	platinum	?	2008	Alekseev E.V.,Krivovichev S.V.,Malcherek T.,Depmeier W. Journal: Journal of Solid State Chemistry Year: 2008 Volume: 181 Number: Pages: 3010-3015
Li((UO2)(AsO4))																				x			Li((UO2)(AsO4))	UO2(NO3)2 Li2CO3	As2O5	820	820-50	green-yellow	platinum	?	2008	Alekseev E.V.,Krivovichev S.V.,Malcherek T.,Depmeier W. Journal: Journal of Solid State Chemistry Year: 2008 Volume: 181 Number: Pages: 3010-3015
Li2((UO2)3(P2O7)2)																				x			Li2((UO2)3(P2O7)2)	UO2(NO3)2 Li2CO3	P2O5	820	820-50	green-yellow	platinum	?	2008	Alekseev E.V.,Krivovichev S.V.,Malcherek T.,Depmeier W. Journal: Journal of Solid State Chemistry Year: 2008 Volume: 181 Number: Pages: 3010-3015
Cs3(UO2)2(PO4)O2																				x			Cs3(UO2)2(PO4)O2	(UO2)3(PO4)2(H2O)4	CsI	750	750-RT	yellow	platinum	?	2013	Yagoubi S.,Renard C.,Abraham F.,Obbade S. Journal: Journal of Solid State Chemistry Year: 2013 Volume: 200 Number: Pages: 13-21
(UO2)(B2O4) + 3 hydroxide phases																x							(UO2)(B2O4) + 3 hydroxide phases	UO2(NO3)	Boric Acid	190	190-RT	yellow	PTFE	water, methanol	2010	Wang Shuao,Alekseev E.V.,Stritzinger J.T.,Depmeier W.,Albrecht Schmitt T.E. Journal: Inorganic Chemistry Year: 2010 Volume: 49 Number: Pages: 2948-2953
Li4((UO2)10O10(Mo2O8))							x																Li4((UO2)10O10(Mo2O8))	UO3 MoO3	Li2Co3	870	870-RT	yellow	platinum	?	2007	Alekseev E.V.,Krivovichev S.V.,Malcherek T.,Depmeier W. Journal: Inorganic Chemistry Year: 2007 Volume: 46 Number: Pages: 8442-8444
Cs9((UO2)8O4(NbO5)(Nb2O8)2)					x																		Cs9((UO2)8O4(NbO5)(Nb2O8)2)	U3O8 Nb2O5	Cs2CO3	1400	1400-RT	yellow	pltainum	methanol	2008	Saad S.,Obbade S.,Yagoubi S.,Renard C.,Abraham F. Journal: Journal of Solid State Chemistry Year: 2008 Volume: 181 Number: Pages: 741-750
Rb2((UO2)3(P2O7)(P4O12))																				x			Rb2((UO2)3(P2O7)(P4O12))	UO2(NO3)2 RbNO3	P2O5	820	82050	greenish-yellow	platinum	?	2009	Alekseev E.V.,Krivovichev S.V.,Depmeier W. Journal: Journal of Solid State Chemistry Year: 2009 Volume: 182 Number: Pages: 2074-2080
Rb((UO2)2(As3O10))																				x			Rb((UO2)2(As3O10))	UO2(NO3)2 RbNO3	As2O5	820	82050	greenish-yellow	platinum	?	2009	Alekseev E.V.,Krivovichev S.V.,Depmeier W. Journal: Journal of Solid State Chemistry Year: 2009 Volume: 182 Number: Pages: 2074-2080
UYb2O2S3			x																				UYb2O2S3	UOS YbS	Sb2S3	1000	1000-RT	dark-red	fused silica	?	2009	Jin Geng Bang,Choi Eun Sang,Ibers J.A. Journal: Inorganic Chemistry Year: 2009 Volume: 48 Number: Pages: 8227-8232
UY2O2S3			x																				UY2O2S3	UOS Y2S3	Sb2S3	1000	1000-RT	dark-red	fused silica	?	2009	Jin Geng Bang,Choi Eun Sang,Ibers J.A. Journal: Inorganic Chemistry Year: 2009 Volume: 48 Number: Pages: 8227-8232
(K3Cs4F)((UO2)3(Si2O7)2)																		x					(K3Cs4F)((UO2)3(Si2O7)2)	UO3 SiO2	CsF-KF	750	750-550	yellow	platinum	water	2009	Lee Cheng shiuan,Wang Sue Lein,Chen Yenhung,Lii Kwanghwa Journal: Inorganic Chemistry Year: 2009 Volume: 48 Number: Pages: 8357-8361
(NaRb6F)((UO2)3(Si2O7)2)																		x					(NaRb6F)((UO2)3(Si2O7)2)	UO3 SiO2	RbF-NaF	750	750-550	yelow	platinum	water	2009	Lee Cheng shiuan,Wang Sue Lein,Chen Yenhung,Lii Kwanghwa Journal: Inorganic Chemistry Year: 2009 Volume: 48 Number: Pages: 8357-8361
Na2Ba2((UO2)S4)																						x	Na2Ba2((UO2)S4)	U, BaS, S	Na2O2	600	600-300	black	fused silica	none	2013	Ward Matthew D.,Klingsporn Jordan M.,Ibers James A. Journal: Inorganic Chemistry Year: 2013 Volume: 52 Number: Pages: 10220-222
K4((UO2)Eu2(Ge2O7)2)			x															x					K4((UO2)Eu2(Ge2O7)2)	UO3, Eu2O3, GeO2	MoO3-KF	950	950-750	yellow	platinum	hot water	2013	Liu Shih-Pu,Chen Meng-Ling,Chang Bor-Chen,Lii Kwang-Hwa Journal: Inorganic Chemistry Year: 2013 Volume: 52 Number: Pages: 3990-3994
TlNb2U2O11.5					x										x								TlNb2U2O11.5	U3O8 Nb2O5	Tl2CO3?	1150	not clear	orange	platinum	?	1987	Gasperin M. Journal: Journal of Solid State Chemistry Year: 1987 Volume: 67 Number: Pages: 219-224
KNbUO6					x																		KNbUO6	U3O8 Nb2O5	K2CO3	1200	not clear	orange	platinum	?	1987	Gasperin M. Journal: Journal of Solid State Chemistry Year: 1987 Volume: 67 Number: Pages: 219-224
K9U6O22.5	x																						K9U6O22.5	U3O8 Nb2O5	K2CO3	1200	?	orange	?	?	1987	Saine M.C.,Gasperin M.,Jove J.,Cousson A. Journal: Journal of the Less-Common Metals Year: 1987 Volume: 132 Number: Pages: 141-148
Ca(K6Ba2)U6O24		x																					Ca(K6Ba2)U6O24	U3O8 Nb2O5, BaCO3, Ca??	K2CO3	1200	?	orange	alumina	?	1987	Saine M.C.,Gasperin M.,Jove J.,Cousson A. Journal: Journal of the Less-Common Metals Year: 1987 Volume: 132 Number: Pages: 141-148
Nb7.6U2.4Ba5.2K.8O30					x																		Nb7.6U2.4Ba5.2K.8O30	U3O8 Nb2O5 BaCO3	K2CO3	1250	shut off at 1250	dark brown	?	?	1988	Saine M.C. Journal: Journal of the Less-Common Metals Year: 1988 Volume: 139 Number: Pages: 315-319
KUO3.5 (K2U2O7)	x																						KUO3.5 (K2U2O7)	U3O8 Nb2O5	KCO3	1247	?	orange	?	?	1988	Jove J.,Cousson A.,Gasperin M. Journal: Journal of the Less-Common Metals Year: 1988 Volume: 139 Number: Pages: 345-350
Na8Ca3.11U3.7O17.52		x																					Na8Ca3.11U3.7O17.52	UO2 CuO	Na2CO3, CaCO3	1200	1200-800 5°/h	?	?	?	1989	Gasperin M.,Cousson A.,He L.,Jove J. Journal: Journal of the Less-Common Metals Year: 1989 Volume: 152 Number: Pages: 339-348
Cs2U4O12	x																						Cs2U4O12	amorphous UO3	Cs2SO4	1150	quenched after 45 h dwell	black	Platinum cup	EtOH, MeOH	1975	van Egmond A.B. Journal of Inorganic and Nuclear Chemistry 1975 37 1929-1931
BaUO4		x																					BaUO4	Solid state BaUO4	BaCl2	1030	quenched after 3 h dwell	deep orange	Platinum crucible	H2O	1976	Reis A.H.jr.,Hoekstra H.R.,Gebert E.,Peterson S.W. Journal of Inorganic and Nuclear Chemistry 1976 38 1481-1485
Cs4U5O17	x																						Cs4U5O17	amorphous UO3	CsCl	700	quenched after 120 h dwell		gold boat		1976	van Egmond A.B.Journal of Inorganic and Nuclear Chemistry 1976 38 1649-1651
Pb3UO6																	x						Pb3UO6	solid state Pb3UO6	PbO	800		dark red		no	1967	Sterns M. Acta Crystallographica (1,1948-23,1967) 1967 23 264-272
Csx(UO2)Oclx																						x	Csx(UO2)Oclx	amorphous UO3	CsCl	600	heating 300 to 600 in several weeks		evacuated glass capsule		1964	Allpress J.G.,Wadsley A.D.Acta Crystallographica (1,1948-23,1967) 1964 17 41-46
beta-CdUO4														x									beta-CdUO4	U3O8	CdCl2						1961	Kovba T.M.,Polunina G.P.,Ippolitova E.A.,Simonov Yu.P.,Spitsyn V.I. Zhurnal Fizicheskoi Khimii 1961 35 719-722
alpha-Li2UO4	x																						alpha-Li2UO4	U3O8	LiCl						1961	Kovba L.M.,Ippolitova E.A.,Simanov Yu.P,Spitsyn V.I. Zhurnal Fizicheskoi Khimii 1961 35 563-568
UTiNb2O10					x										x								UTiNb2O10	U3O8	H3BO3	1200		black			1969	Comptes Rendus des Seances de l'Academie des Sciences, Serie C: Sciences Chimiques 1969 268 1426-1428
MgUO4		x																					MgUO4	U3O8	MgCl2	melt MgCl2 >714					1954	Zachariasen W.H. Acta Crystallographica (1,1948-23,1967) 1954 7 788-791
CaUO4		x																					CaUO4	U3O8 or UO3	CaCl2	1000	quenched after 30 min dwell	yellow green			1948	Zachariasen W.H. Acta Crystallographica (1,1948-23,1967) 1948 1 281-285
SrUO4		x																					SrUO4	U3O8 or UO3	SrCl2	1000	quenched after 30 min dwell	yellow green			1948	Zachariasen W.H. Acta Crystallographica (1,1948-23,1967) 1948 1 281-285
Sr[(UO2)2(B2O5)O]																x							Sr[(UO2)2(B2O5)O]	UO2(NO3)2∙6H2O, Sr(NO3)2	H3BO3/Li2B4O7	965 (10 hr)	to 450 in 103 hours	orange	Platinum	-	2016	Hao, Y., Klepov, V. V., Murphy, G. L., Modolo, G., Bosbach, D., Albrecht-Schmitt, T. E., Kennedy, B. J., Wang, S., Alekseev, E. V., “Influence of Synthetic Conditions on Chemistry and Structural Properties of Alkaline Earth Uranyl Borates”, Cryst. Growth Des., 2016, 16, 5923-5931.
Cs6[(UO2)12(BO3)8O3](H2O)6																x							Cs6[(UO2)12(BO3)8O3](H2O)6	UO2(NO3)2∙6H2O, CsNO3	B2O3	1000 (5 hr)	to 600 in 80 hours; then to 450 in 15 hours	yellow	Platinum	-	2017	Hao, Y., Kegler, P., Bosbach, D., Albrecht-Schmitt, T. E., Wang, S., Alekseev, E. V., “Divergent Structural Chemistry of Uranyl Borates Obtained from Solid State and Hydrothermal Conditions”, Cryst. Growth Des., 2017, 17, 5898-5907.
Rb6[(UO2)12(BO3)8O3](H2O)6																x							Rb6[(UO2)12(BO3)8O3](H2O)6	UO2(NO3)2∙6H2O, RbNO3	B2O3	1000 (5 hr)	to 600 in 80 hours; then to 450 in 15 hours	yellow	Platinum	-	2017	Hao, Y., Kegler, P., Bosbach, D., Albrecht-Schmitt, T. E., Wang, S., Alekseev, E. V., “Divergent Structural Chemistry of Uranyl Borates Obtained from Solid State and Hydrothermal Conditions”, Cryst. Growth Des., 2017, 17, 5898-5907.
K4Sr4[(UO2)13(B2O5)2(BO3)2O12]																x							K4Sr4[(UO2)13(B2O5)2(BO3)2O12]	UO2(NO3)2∙6H2O, SrCO3	H3BO3/K2B4O7	980 (5 hr)	to 550 in 86 hours	yellow	Platinum	-	2017	Hao, Y., Kegler, P., Bosbach, D., Albrecht-Schmitt, T. E., Wang, S., Alekseev, E. V., “Divergent Structural Chemistry of Uranyl Borates Obtained from Solid State and Hydrothermal Conditions”, Cryst. Growth Des., 2017, 17, 5898-5907.
Cs6[(UO2)2(MoO4)3(MoO5)]							x																Cs6[(UO2)2(MoO4)3(MoO5)]	U3O8, MoO3	Cs2CO3	950 (12 hr)	to RT in 186 hours	yellow-orange	Platinum	Hot H2O/EtOH	2017	Yagoubi, S., Obbade, S., Saad, S., Abraham, F., “From ∞1[(UO2)2O(MoO4)4]6− to ∞1[(UO2)2(MoO4)3(MoO5)]6− infinite chains in A6U2Mo4O21 (A=Na, K, Rb, Cs) compounds: Synthesis and crystal structure of Cs6[(UO2)2(MoO4)3(MoO5)]”, J. Solid State Chem., 2011, 184, 971-981.
𝛽-Cs2[(UO2)2(MoO4)3]							x																𝛽-Cs2[(UO2)2(MoO4)3]	UO3	Cs(COOCH3)/MoO3	850 (2 hr)	to 650 in 5 hours; dwell at 650 (2 hr); cool to 350 in 50 hours; cool to RT in 22 hours	yellow	Alumina	-	2011	Krivovichev, S. V., Cahill, C. L., Burns, P. C., “Syntheses and Crystal Structures of Two Topologically Related Modifications of Cs2[(UO2)2(MoO4)3]”, Inorg. Chem., 2002, 41, 34-39.
Ag6[(UO2)3O(MoO4)5]							x																Ag6[(UO2)3O(MoO4)5]	UO3	AgNO3/MoO3	650 (5 hr)	to 300 in 50 hours; then to 50 in 10 hours	orange	Platinum	-	2002	Krivovichev, S. V., Burns, P. C., “Synthesis and Structure of Ag6[(UO2)3O(MoO4)5]: A Novel Sheet of Triuranyl Clusters and MoO4 Tetrahedra”, Inorg. Chem., 2002, 41, 4108-4110.
𝛼-Ba2[UO2(PO4)2]																				x			𝛼-Ba2[UO2(PO4)2]	UO2(NO3)2∙6H2O, BaCO3, BPO4	B2O3	1000 (2 hr)	to 300 in 100 hours	green	Platinum	-	2014	Wu, S., Kowalski, P. M., Yu, N., Malcherek, T., Depmeier, W., Bosbach, D., Wang, S., Suleimanov, E. V., Albrecht-Schmitt, T. E., Alekseev, E. V., “Highly distorted uranyl ion coordination and one/two-dimensional structural relationship in the Ba2[UO2(TO4)2] (T = P, As) system: an experimental and computational study”, Inorg. Chem., 2014, 53, 7650-7660.
𝛽-Ba2[UO2(PO4)2]																				x			𝛽-Ba2[UO2(PO4)2]	UO2(NO3)2∙6H2O, BaCO3, BPO4	H3BO3	1300 (2 hr)	to 300 in 143 hours	yellow	Platinum	-	2014	Wu, S., Kowalski, P. M., Yu, N., Malcherek, T., Depmeier, W., Bosbach, D., Wang, S., Suleimanov, E. V., Albrecht-Schmitt, T. E., Alekseev, E. V., “Highly distorted uranyl ion coordination and one/two-dimensional structural relationship in the Ba2[UO2(TO4)2] (T = P, As) system: an experimental and computational study”, Inorg. Chem., 2014, 53, 7650-7660.
Ba2[UO2(AsO4)2]																				x			Ba2[UO2(AsO4)2]	UO2(NO3)2∙6H2O, Ba(NO3)2, NH4H2AsO4	B2O3	1000 (5 hr)	to 300 in 140 hours	green	Platinum	-	2014	Wu, S., Kowalski, P. M., Yu, N., Malcherek, T., Depmeier, W., Bosbach, D., Wang, S., Suleimanov, E. V., Albrecht-Schmitt, T. E., Alekseev, E. V., “Highly distorted uranyl ion coordination and one/two-dimensional structural relationship in the Ba2[UO2(TO4)2] (T = P, As) system: an experimental and computational study”, Inorg. Chem., 2014, 53, 7650-7660.
Na2Li8[(UO2)11O12(WO5)2]								x															Na2Li8[(UO2)11O12(WO5)2]	UO2(CH3COO)2∙2H2O, WO3	Li2CO3/Na2CO3	950 (40 min)	to 200 in 187.5 hours	orange	-	-	2006	Alekseev, E. V., Krivovichev, S. V., Depmeier, W., Siidra, O. I., Knorr, K., Suleimanov, E. V., Chuprunov, E. V., “Na2Li8[(UO2)11O12(WO5)2]: Three Different Uranyl-Ion Coordination Geometries and Cation–Cation Interactions”, Angew. Chem. Int. Ed., 2006, 118, 7391-7393.
K2[(UO2)3(TeO3)2O2]																					x		K2[(UO2)3(TeO3)2O2]	UO3, TeO3	KCl	800 (5 d)	to RT in 26 hours	yellow	Silica	-	2004	Woodward, J. D., Almond, P. M., Albrecht-Schmitt, T. E., “Synthesis and crystal structures of the layered uranyl tellurites A2[(UO2)3(TeO3)2O2] (A=K, Rb, Cs)”, J. Solid State Chem., 2004, 177, 3971-3976.
Rb2[(UO2)3(TeO3)2O2]																					x		Rb2[(UO2)3(TeO3)2O2]	UO3, TeO3	RbCl	800 (5 d)	to RT in 26 hours	yellow	Silica	-	2004	Woodward, J. D., Almond, P. M., Albrecht-Schmitt, T. E., “Synthesis and crystal structures of the layered uranyl tellurites A2[(UO2)3(TeO3)2O2] (A=K, Rb, Cs)”, J. Solid State Chem., 2004, 177, 3971-3976.
Cs2[(UO2)3(TeO3)2O2]																					x		Cs2[(UO2)3(TeO3)2O2]	UO3, TeO3	CsCl	800 (5 d)	to RT in 26 hours	yellow	Silica	-	2004	Woodward, J. D., Almond, P. M., Albrecht-Schmitt, T. E., “Synthesis and crystal structures of the layered uranyl tellurites A2[(UO2)3(TeO3)2O2] (A=K, Rb, Cs)”, J. Solid State Chem., 2004, 177, 3971-3976.
𝛼-K[(UO2)(P3O9)]																				x			𝛼-K[(UO2)(P3O9)]	UO2(NO3)2∙6H2O, K2CO3	P2O5	850 (no dwell)	to 150 in 140 hours	yellow	Platinum	-	2008	Alekseev, E. V., Krivovichev, S. V., Depmeier, W., Knorr, K., “Complex Topology of Uranyl Polyphosphate Frameworks: Crystal Structures of α-, β-K[(UO2)(P3O9)] and K[(UO2)2(P3O10)]”, Z. Anorg. Allg. Chem., 2008, 634, 1527-1532.
𝛽-K[(UO2)(P3O9)]																				x			𝛽-K[(UO2)(P3O9)]	UO2(NO3)2∙6H2O, K2CO3	P2O5	850 (no dwell)	to 150 in 140 hours	yellow	Platinum	-	2008	Alekseev, E. V., Krivovichev, S. V., Depmeier, W., Knorr, K., “Complex Topology of Uranyl Polyphosphate Frameworks: Crystal Structures of α-, β-K[(UO2)(P3O9)] and K[(UO2)2(P3O10)]”, Z. Anorg. Allg. Chem., 2008, 634, 1527-1532.
K[(UO2)2(P3O10)]																				x			K[(UO2)2(P3O10)]	UO2(NO3)2∙6H2O, K2CO3	P2O5	850 (no dwell)	to 150 in 140 hours	green	Platinum	-	2008	Alekseev, E. V., Krivovichev, S. V., Depmeier, W., Knorr, K., “Complex Topology of Uranyl Polyphosphate Frameworks: Crystal Structures of α-, β-K[(UO2)(P3O9)] and K[(UO2)2(P3O10)]”, Z. Anorg. Allg. Chem., 2008, 634, 1527-1532.
UY4O3S5			x																			x	UY4O3S5	UOS, Y2S3	Sb2S3	1000 (8 d)	to 500 in 8 days; then to RT in 8 hours	red	Silica	-	2009	Jin, G. B., Choi, E. S., Wells, D. M., Ibers, J. A., “Synthesis and characterization of the new uranium yttrium oxysulfide UY4O3S5”, J. Solid State Chem., 2009, 182, 1861-1866.
Ba4[(UO2)7(UO4)(AsO4)2O7]																				x			Ba4[(UO2)7(UO4)(AsO4)2O7]	UO2(NO3)2∙6H2O, Ba(NO3)2	As2O5	1150 (no dwell)	to RT in 161 hours	red	Platinum	-	2009	Wu, S., Ling, J., Wang, S., Skanthakumar, S., Soderholm, L., Albrecht-Schmitt, T. E., Alekseev, E. V., Krivovichev, S. V., Depmeier, W., “Uranium(VI) Adopts a Tetraoxido Core”, Eur. J. Inorg. Chem., 2009, 2009, 4039-4042.
UTa2O(S2)3Cl6				x																		x	UTa2O(S2)3Cl6	UCl4	TaS2	610 (24 hr)	to 200 in 100 hours; then to RT in 37 hours	orange	Silica	-	2010	Wells, D. M., Chan, G. H., Ellis, D. E., Ibers, J. A., “UTa2O(S2)3Cl6: A ribbon structure containing a heterobimetallic 5d–5f M3 cluster”, J. Solid State Chem., 2010, 183, 285-290.
UOS																						x	UOS	UOS powder (UO2, C, S)	Sb2S3	1000 (7 d)	to 700 in 4 days; then to RT in 10 hours	black	Silica	-	2010	Jin, G. B., Raw, A. D., Skanthakumar, S., Haire, R. G., Soderholm, L., Ibers, J. A., “Single-crystal structures of uranium and neptunium oxychalcogenides AnOQ (An=U, Np; Q=S, Se)”, J. Solid State Chem., 2010, 183, 547-550.
UOSe																						x	UOSe	UOSe (U, Se, SeO2, Pd)	Sb2Se3	1000 (7 d)	1000 (7 d)	black	Silica	-	2010	Jin, G. B., Raw, A. D., Skanthakumar, S., Haire, R. G., Soderholm, L., Ibers, J. A., “Single-crystal structures of uranium and neptunium oxychalcogenides AnOQ (An=U, Np; Q=S, Se)”, J. Solid State Chem., 2010, 183, 547-550.
CsU2(PO4)3																				x			CsU2(PO4)3	UP2 Se	CsCl	1000 (192 hr)	to 950 in 24 hours; dwell at 950 or 192 hours; cooled to 550 in 120 hours; then to RT in 24 hours	blue-purple	Silica	H2O	2012	Oh, G. N., Ringe, E., Van Duyne, R. P., Ibers, J. A., “Synthesis, structure, and optical properties of CsU2(PO4)3”, J. Solid State Chem., 2012, 185, 124-129.
UEr2O2S3			x																			x	UEr2O2S3	UOS, Er, S	Sb2S3	1000 (7 d)	to 600 in 200 hours	black	Silica	-	2012	Raw, A. D., Ibers, J. A., “Synthesis and structural characterization of the new compound UEr2O2S3 and the evidence for the old compound U2ErO2S3”, J. Solid State Chem., 2012, 187, 282-285.
Cs11Eu4(UO2)2(P2O7)6(PO4)			x																	x			Cs11Eu4(UO2)2(P2O7)6(PO4)	UO3, Eu2O3	CsPO3/Cs4P2O7	600 (2 d); 850 (10 d)	to 720 in 130 hours	orange	-	-	1997	Pobedina, A. B., Ilyukhin, A. B., “Synthesis, properties and structure of Cs11Eu4(UO2)2(P2O7)6(PO4)”, Zh. Neorg. Khim., 1997, 42, 1120-1124.
UYb2O2Se3			x																			x	UYb2O2Se3	UOSe, YbSe, Se	Sb2Se3	950 (7 d)	to 650 in 100 hours	black	Silica	-	2012	Raw, A. D., Ibers, J. A., “Syntheses and crystal structures of the quaternary uranium lanthanide oxyselenides UYb2O2Se3 and U2Ln2O4Se3 (Ln=Pr, Sm, Gd)”, J. Solid State Chem., 2012, 186, 177-181.
U2Pr2O4Se3			x																			x	U2Pr2O4Se3	USe2, Pr6O11, Se	Sb2Se3	1000 (100 hr)	to 800 in 100 hours; dwell for 72 hours; cool to 700 in 36 hours; then to RT in 12 hours	black	Silica	-	2012	Raw, A. D., Ibers, J. A., “Syntheses and crystal structures of the quaternary uranium lanthanide oxyselenides UYb2O2Se3 and U2Ln2O4Se3 (Ln=Pr, Sm, Gd)”, J. Solid State Chem., 2012, 186, 177-181.
U2Sm2O4Se3			x																			x	U2Sm2O4Se3	U, Sm2Se3, SeO2, Se	Sb2Se3	1000 (168 hr)	to 700 in 100 hours	black	Silica	-	2012	Raw, A. D., Ibers, J. A., “Syntheses and crystal structures of the quaternary uranium lanthanide oxyselenides UYb2O2Se3 and U2Ln2O4Se3 (Ln=Pr, Sm, Gd)”, J. Solid State Chem., 2012, 186, 177-181.
U2Gd2O4Se3			x																			x	U2Gd2O4Se3	USe2, Gd2O3, Se	Sb2Se3	1000 (168 hr)	to 800 in 100 hours	black	Silica	-	2012	Raw, A. D., Ibers, J. A., “Syntheses and crystal structures of the quaternary uranium lanthanide oxyselenides UYb2O2Se3 and U2Ln2O4Se3 (Ln=Pr, Sm, Gd)”, J. Solid State Chem., 2012, 186, 177-181.
Cs2(UO2)(CrO4)2						x																	Cs2(UO2)(CrO4)2	UO2(NO3)2∙6H2O, CrO3	CsNO3	270 (10 hr)	to 100 in 56.67 hours; then to RT in 11 hours	yellow-green	Platinum	-	2012	Siidra, O. I., Nazarchuk, E. V., Krivovichev, S. V., “Syntheses and crystal structures of two novel alkaline uranyl chromates A2(UO2)(CrO4)2 (A=Rb, Cs) with bidentate coordination mode of uranyl ions by chromate anions”, J. Solid State Chem., 2012, 187, 286-290.
Rb2(UO2)(CrO4)2						x																	Rb2(UO2)(CrO4)2	UO2(NO3)2∙6H2O, CrO3	RbNO3	270 (10 hr)	to 100 in 56.67 hours; then to RT in 11 hours	orange-green	Platinum	-	2012	Siidra, O. I., Nazarchuk, E. V., Krivovichev, S. V., “Syntheses and crystal structures of two novel alkaline uranyl chromates A2(UO2)(CrO4)2 (A=Rb, Cs) with bidentate coordination mode of uranyl ions by chromate anions”, J. Solid State Chem., 2012, 187, 286-290.
U7O2Se12																						x	U7O2Se12	U, Ir3Se8	CsCl	900 (6 hr)	to 800 in 12 hours; dwell for 96 hours; cooled to 500 in 150 hours; then to RT in 48 hours	black	Silica	-	2014	Ward, M. D., Ibers, J. A., “The Synthesis and Crystal Structure of U7O2Se12”, Z. Anorg. Allg. Chem., 2014, 640, 1585-1588.
K8U7O24	x																						K8U7O24	UO2, UO3, CaO	KF	950 (48 hr)	to 750 in 33.3 hours	black	Copper	H2O	2014	Read, C. M., Smith, M. D., zur Loye, H.-C., “Single Crystal Growth and Structural Characterization of a Novel Mixed-Valent Ternary Uranium Oxide, K8U7O24”, J. Chem. Crystallogr., 2014, 44, 604-608.
KUO3Cl																						x	KUO3Cl	U3O8, CoCl2∙6H2O	KCl	900 (12 hr)	to 500 in 58.3 hours	yellow	Alumina	H2O	2015	Read, C. M., Smith, M. D., zur Loye, H.-C., “Synthesis, Crystal Structure, and Optical Properties of a New Complex Uranium Oxychloride, KUO3Cl”, J. Chem. Crystallogr., 2015, 45, 440-444.
(Ca0.5Na0.5)2NaUSi8O20																		x					(Ca0.5Na0.5)2NaUSi8O20	UO2, CaSiO3	Na2WO4	730 (140 hr)	to 430 in 150 hours; then to RT in 6 hours	green	Silica	H2O	2015	Jin, G. B., Soderholm, L., “Solid-state syntheses and single-crystal characterizations of three tetravalent thorium and uranium silicates”, J. Solid State Chem., 2015, 221, 405-410.
Ca2(UO3)(TeO3)2																					x		Ca2(UO3)(TeO3)2	UO2(NO3)2∙6H2O, CaO	H6TeO6	700 (10 hr)	to 550 in 75 hours; then to RT in 117 hours	yellow	Platinum	-	2016	Zadoya, A. I., Siidra, O. I., Bubnova, R. S., Nazarchuk, E. V., Bocharov, S. N., “Tellurites of Hexavalent Uranium: First Observation of Polymerized (UO4)2- Tetraoxido Cores”, Eur. J. Inorg. Chem., 2016, 2016, 4083-4089.
K2(UO2)2O2(TeO3)																					x		K2(UO2)2O2(TeO3)	UO2(NO3)2∙6H2O, KCl	H6TeO6	700 (10 hr)	to 550 in 75 hours; then to RT in 117 hours	yellow	Platinum	-	2016	Zadoya, A. I., Siidra, O. I., Bubnova, R. S., Nazarchuk, E. V., Bocharov, S. N., “Tellurites of Hexavalent Uranium: First Observation of Polymerized (UO4)2- Tetraoxido Cores”, Eur. J. Inorg. Chem., 2016, 2016, 4083-4089.
U(PO3)4																				x			U(PO3)4	UO2(NO3)2∙6H2O, Nd(NO3)3∙6H2O, Na2CO3	conc. H3PO4	500 (no dwell)	naturally cooled to RT	green	Platinum	H2O	2015	Yu, N., Klepov, V. V., Neumeier, S., Depmeier, W., Bosbach, D., Suleimanov, E. V., Alekseev, E. V., “Further Insight into Uranium and Thorium Metaphosphate Chemistry and the Effect of Nd Incorporation into Uranium(IV) Metaphosphate : Actinide Metaphosphate Chemistry”, Eur. J. Inorg. Chem., 2015, 2015, 1562-1568.
(Nd0.38U0.62)(PO3)4			x																	x			(Nd0.38U0.62)(PO3)4	UO2(NO3)2∙6H2O, Nd(NO3)3∙6H2O, Na2CO3	conc. H3PO4	500 (no dwell)	naturally cooled to RT	green	Platinum	H2O	2015	Yu, N., Klepov, V. V., Neumeier, S., Depmeier, W., Bosbach, D., Suleimanov, E. V., Alekseev, E. V., “Further Insight into Uranium and Thorium Metaphosphate Chemistry and the Effect of Nd Incorporation into Uranium(IV) Metaphosphate : Actinide Metaphosphate Chemistry”, Eur. J. Inorg. Chem., 2015, 2015, 1562-1568.
U(P4O12)																							U(P4O12)	U3O8	conc. H3PO4	850 (5 hr)	naturally cooled to RT	green	Porcelain	-	2015	Yu, N., Klepov, V. V., Neumeier, S., Depmeier, W., Bosbach, D., Suleimanov, E. V., Alekseev, E. V., “Further Insight into Uranium and Thorium Metaphosphate Chemistry and the Effect of Nd Incorporation into Uranium(IV) Metaphosphate : Actinide Metaphosphate Chemistry”, Eur. J. Inorg. Chem., 2015, 2015, 1562-1568.
MgUO4		x																					MgUO4	U3O8	MgCl2			yellow			1954	Zeitschrift für Naturforschung B 1954 9 568-569
UO2Se2O5																					x		UO2Se2O5	UO3	SeO2	447 C		pale-yellow	sealed tube	sublimation at 197 C	1985	Acta Crystallographica C 1985 41 1571-1573
PbUO4																	x						PbUO4	U(MoO4)2	PbClF	550 C		orange			1986	Acta Crystallographica C 1986 42 1684-1685
NaBUO5																x							NaBUO5	U3O8 Na2CO3	B2O3	1100 C		light yellow		boiling water	1988	Acta Crystallographica C 1988 44 415-416
MgB2UO7																x							MgB2UO7	U3O8 MgCO3	B2O3	1200 C		colorless		boiling water	1987	Acta Crystallographica C 1987 43 2264-2266
TlNb2U2O11.5					x																		TlNb2U2O11.5	U3O8 Nb2O5	Tl2CO3	1150 C	slow cool	orange	Pt crucible		1987	Journal of Solid State Chemistry 1987 67 219-224
KNbUO6					x																		KNbUO6	U3O8 Nb2O5	K2CO3	1200 C	slow cool	orange	Pt crucible		1987	Journal of Solid State Chemistry 1987 67 219-224
RbNbUO6					x																		RbNbUO6	U3O8 Nb2O5	Rb2CO3	1300 C	slow cool	orange	Pt crucible		1987	Journal of Solid State Chemistry 1987 67 219-224
β-Li6UO6	x																						β-Li6UO6	U3O8	Li2O2	910 C for 3d, 800 C for 5d, 660 C for 7d	5 C/h	yellow	Au tube		1985	Zeitschrift fuer Anorganische und Allgemeine Chemie 1985 528 129-137
⍺-Li6UO6	x																						⍺-Li6UO6	U3O8	Li2O2	910 C for 3d, 800 C for 5d, 660 C for 7d	quench	yellow	Au tube		1985	Zeitschrift fuer Anorganische und Allgemeine Chemie 1985 528 129-137
UB2O6																x							UB2O6	(NH4)U2O7	B2O3	850-900 C for 1-4 weeks	none		Pt crucible	methanol	1980	Journal of Crystal Growth 1980 49 207-210
Rb2(UO2)(P2O7)																				x			Rb2(UO2)(P2O7)	Rb2(UO2)(P2O7)	Rb4P2O7	>1220 C	997 C			5% soln H2O2 and Na2CO3	1981	Izvestiya Akademii Nauk SSSR, Neorganicheskie Materialy 1981 17 1062-1066
Cs2(UO2)(P2O7)																				x			Cs2(UO2)(P2O7)	Cs2(UO2)(P2O7)	CsCl	> 827 C	677 C			5% soln H2O2 and Na2CO3	1981	Izvestiya Akademii Nauk SSSR, Neorganicheskie Materialy 1981 17 1062-1066
CsNbUO6					x																		CsNbUO6	U3O8 Nb2O5	Cs2CO3	1200 C for 15 h		yellow		boiling water	1987	Acta Crystallographica C 1987 43 404-406
Na2(UO4)	x																						Na2(UO4)	U3O8 Nb2O5	Na2CO3	1190 C for 15 h	slow cool		Pt crucible		1985	Journal of Solid State Chemistry 1985 60 316-319
CaB2U2O10																x							CaB2U2O10	U3O8 CaCO3	B2O3	1150 C for 15 h		yellow		boiling water	1987	Acta Crystallographica C 1987 43 1247-1250
Ni7B4UO16																x							Ni7B4UO16	U3O8 NiO	B2O3	100 C for 15 h		black		boiling water	1989	Acta Crystallographica C 1989 45 981-983
K9BiU6O24																			x				K9BiU6O24	U3O8 Bi2O3 K2CO3	B2O3	1200 C for 15 h		red		boiling water	1991	Acta Crystallographica C 1991 47 2278-2279
Cs2UNb6Cl15O3					x																	x	Cs2UNb6Cl15O3	UCl4 NbCl5 Nb2O5 Nb	CsCl	700 C for 1 week			evacuted silica tube		1997	Materials Research Bulletin 1997 32 25-33
K2(UO2)2(MoO4)O2							x																K2(UO2)2(MoO4)O2	U3O8 MoO3	K2CO3	950 C for 60 h	5 C/h to RT	yellow	Pt crucible	ethanol	2003	Journal of Solid State Chemistry 2003 174 19-31
K8(UO2)8(MoO5)3O6							x																K8(UO2)8(MoO5)3O6	U3O8 MoO4	K2CO3	950 C for 60 h	5 C/h to RT	orange	Pt crucible	ethanol	2003	Journal of Solid State Chemistry 2003 174 19-31
LiBUO5																x							LiBUO5	U3O8 LiCO3	B2O3	1080 C for 15 h		yellow		boiling water	1990	Acta Crystallographica C 1990 46 372-374
Cs2U4O12	x																						Cs2U4O12	UO3	Cs2SO4	1150 C for 45 h		black	Pt cup	ethanol+methanol	1975	Journal of Inorganic and Nuclear Chemistry 1975 37 1929-1931
K2(UO2)(MoO4)2							x																K2(UO2)(MoO4)2	K2(UO2)(MoO4)2	MoO3	> 795 C	none			evaporation	1988	Izvestiya Akademii Nauk SSSR, Neorganicheskie Materialy 1988 24 109-115
(UO2)2P6O17																							(UO2)2P6O17	UO3	Polyphosphoric acid	400-420 C						Zhurnal Neorganicheskoi Khimii 1981 26 713-717

## Sheet: Sheet2
Compound	U Oxidation State	Reagents	Flux	Dwell Temp (time)	Cool Temp °C (rate °C/h)	Color	Reaction Vessel	Wash	year	Reference
Mixed Oxides
Ba2CuUO6	6	U3O8, BaCO3, CuO	K2CO3	1050 °C (48 h)	850 °C (4 °C/h)	brown	Alumina Crucible	water	2010	Roof, I. P.; Smith, M. D.; zur Loye, H.-C., High Temperature Flux Crystal Growth of Uranium-Containing Perovskites: Sr3UO6 and Ba2MUO6 (M = Cu, Ni, Zn), J. Chem. Crystallogr. 2010, 40, 491-495.
Ba2NiUO6	6	U3O8, BaCO3, NiO	K2CO3	1150 °C (48 h)	850 °C (4 °C/h)	dark amber	Alumina Crucible	water	2010	Roof, I. P.; Smith, M. D.; zur Loye, H.-C., High Temperature Flux Crystal Growth of Uranium-Containing Perovskites: Sr3UO6 and Ba2MUO6 (M = Cu, Ni, Zn), J. Chem. Crystallogr. 2010, 40, 491-495.
Ba2ZnUO6	6	U3O8, BaCO3, ZnO	K2CO3	1050 °C (48 h)	850 °C (4 °C/h)	orange	Alumina Crucible	water	2010	Roof, I. P.; Smith, M. D.; zur Loye, H.-C., High Temperature Flux Crystal Growth of Uranium-Containing Perovskites: Sr3UO6 and Ba2MUO6 (M = Cu, Ni, Zn), J. Chem. Crystallogr. 2010, 40, 491-495.
MnUO4	6	U3O8, MnCl2•4H2O	CsCl	900 °C (12 h)	550 °C (6 °C/h)	black	Alumina Crucible	water	2014	Read, C. M.; Smith, M. D.; zur Loye, H.-C., Single crystal growth and structural characterization of ternary transition-metal uranium oxides: MnUO4, FeUO4, and NiU2O6, Solid State Sci. 2014, 37, 136-143.
FeUO4	5	U3O8, FeCl2•4H2O	BaCl2	1050 °C (24 h)	850 °C (3 °C/h)	black	Alumina Crucible	water	2014	Read, C. M.; Smith, M. D.; zur Loye, H.-C., Single crystal growth and structural characterization of ternary transition-metal uranium oxides: MnUO4, FeUO4, and NiU2O6, Solid State Sci. 2014, 37, 136-143.
NiU2O6	5	U3O8, NiCl2•4H2O	KCl	900 °C (12 h)	700 °C (6 °C/h)	black	Alumina Crucible	water	2014	Read, C. M.; Smith, M. D.; zur Loye, H.-C., Single crystal growth and structural characterization of ternary transition-metal uranium oxides: MnUO4, FeUO4, and NiU2O6, Solid State Sci. 2014, 37, 136-143.
Cs2Mn3U6O22	6	U3O8, MnCl2•4H2O	CsCl	900 °C (9 h)	quenched	orange	Alumina Crucible	water	2015	Read, C. M.; Gordon, E.; Smith, M. D.; Yeon, J.; Morrison, G.; Whangbo, M.-H.; zur Loye, H.-C., Synthesis of the Layered Quaternary Uranium Containing Oxide Cs2Mn3U6O22 and Characterization of its Magnetic Properties, Inorg. Chem. 2015, 54, 5495-5503.
K2MnU3O11	6	U3O8, MnCl2•4H2O	KCl	900 °C (12 h)	500 °C (6 °C/h)	red	Alumina Crucible	water	2015	Read, C. M.; Morrison, G.; Yeon, J.; Smith, M. D.; zur Loye, H.-C., A2MnU3O11 (A = K, Rb) and Li3.2Mn1.8U6O22: Three New Alkali-Metal Manganese Uranium(VI) Oxides Related to Natrotantite, Inorg. Chem. 2015, 54, 6993-6999.
Rb2MnU3O11	6	U3O8, MnCl2•4H2O	RbCl	950 °C (12 h)	500 °C (6 °C/h)	red	Alumina Crucible	water	2015	Read, C. M.; Morrison, G.; Yeon, J.; Smith, M. D.; zur Loye, H.-C., A2MnU3O11 (A = K, Rb) and Li3.2Mn1.8U6O22: Three New Alkali-Metal Manganese Uranium(VI) Oxides Related to Natrotantite, Inorg. Chem. 2015, 54, 6993-6999.
Li3.2Mn1.8U6O22	6	U3O8, MnCl2•4H2O	LiCl	900 °C (12 h)	500 °C (6 °C/h)	red	Alumina Crucible	water	2015	Read, C. M.; Morrison, G.; Yeon, J.; Smith, M. D.; zur Loye, H.-C., A2MnU3O11 (A = K, Rb) and Li3.2Mn1.8U6O22: Three New Alkali-Metal Manganese Uranium(VI) Oxides Related to Natrotantite, Inorg. Chem. 2015, 54, 6993-6999.
Na4.5Nd0.5UO6	6	U3O8, Nd2O3	NaOH/KOH	700 °C (24 h)	600 °C (15 °C/h)	orange	Alumina Crucible	methanol	2013	Read, C. M.; Smith, M. D.; zur Loye, H.-C., Synthesis and Crystal Structure of a New Complex Uranium Oxide, Na4.5Nd0.5UO6, J. Chem. Crystallogr. 2013, 43, 484-487.
Pb3UO6	6	solid state Pb3UO6	PbO	800 °C		dark red			1967	Sterns, M., The crystal structure of Pb3UO6, Acta Crystallogr. 1967, 23, 264-272.
β-CdUO4	6	U3O8	CdCl2						1961	Kovba, T. M.; Polunina, G. P.; Ippolitova, E. A.; Simonov, Y., The crystal structure of uranates. Uranates containing uranyl oxygen chains, Zh. Fiz. Khim. 1961, 35, 719-722.
PbUO4	6	U(MoO4)2	PbClF	550 °C (overnight)		orange			1986	Cremers, T. L.; Eller, P. G.; Larson, E. M.; Rosenzweig, A., Single-crystal structure of lead uranate(VI), Acta Crystallogr. C 1986, 42, 1684-1685.
K9BiU6O24	6	U3O8, Bi2O3, K2CO3	B2O3	1200 °C (15 h)		red		boiling water	1991	Gasperin, M.; Rebizant, J.; Dancausse, J. P.; Meyer, D.; Cousson, A., Structure de K9BiU6O24, Acta Crystallogr. C 1991, 47, 2278-2279.
Uranates
K2UO4	6	U3O8	KOH	750 °C (24 h)	650 °C (2 °C/h)	orange-yellow	Silver Tube	methanol	2010	Roof, I. P.; Smith, M. D.; zur Loye, H.-C., Crystal growth of K2UO4 and Na4UO5 using hydroxide fluxes, J. Cryst. Growth 2010, 312, 1240-1243.
Na4UO5	6	U3O8	NaOH	750 °C (24 h)	650 °C (2 °C/h)	orange-yellow	Silver Tube	methanol	2010	Roof, I. P.; Smith, M. D.; zur Loye, H.-C., Crystal growth of K2UO4 and Na4UO5 using hydroxide fluxes, J. Cryst. Growth 2010, 312, 1240-1243.
Sr3UO6	6	U3O8, SrCO3	K2CO3	1150 °C (48 h)	850 °C (6 °C/h)	orange	Alumina Crucible	water	2010	Roof, I. P.; Smith, M. D.; zur Loye, H.-C., High Temperature Flux Crystal Growth of Uranium-Containing Perovskites: Sr3UO6 and Ba2MUO6 (M = Cu, Ni, Zn), J. Chem. Crystallogr. 2010, 40, 491-495.
Ba2Na0.83U1.17O6	6	U3O8, BaCO3	Na2CO3	1050 °C (24 h)	800 °C (15 °C/h)	orange	Alumina Crucible	water	2010	Roof, I. P.; Smith, M. D.; zur Loye, H.-C., Crystal growth of uranium-containing complex oxides: Ba2Na0.83U1.17O6, BaK4U3O12 and Na3Ca1.5UO6, Solid State Sci. 2010, 12, 1941-1947.
BaK4U3O12	6	U3O8, BaCO3	K2CO3	1050 °C (24 h)	800 °C (15 °C/h)	orange	Alumina Crucible	water	2010	Roof, I. P.; Smith, M. D.; zur Loye, H.-C., Crystal growth of uranium-containing complex oxides: Ba2Na0.83U1.17O6, BaK4U3O12 and Na3Ca1.5UO6, Solid State Sci. 2010, 12, 1941-1947.
Na3Ca1.5UO6	6	U3O8, BaCO3	Na2CO3	1050 °C (24 h)	800 °C (15 °C/h)	orange	Alumina Crucible	water	2010	Roof, I. P.; Smith, M. D.; zur Loye, H.-C., Crystal growth of uranium-containing complex oxides: Ba2Na0.83U1.17O6, BaK4U3O12 and Na3Ca1.5UO6, Solid State Sci. 2010, 12, 1941-1947.
CaUO4	6	UO2, CaCO3	K2CO3	900 °C (48 h) in N2	800 °C (5 °C/h)	Amber	Alumina Crucible	water	2013	Read, C. M.; Bugaris, D. E.; zur Loye, H.-C., Single crystal growth and structural characterization of four complex uranium oxides: CaUO4, β-Ca3UO6, K4CaU3O12, and K4SrU3O12, Solid State Sci. 2013, 17, 40-45.
β-Ca3UO6	6	UO2, CaCO3	K2CO3	900 °C (48 h) in N2	800 °C (5 °C/h)	yellow	Alumina Crucible	water	2013	Read, C. M.; Bugaris, D. E.; zur Loye, H.-C., Single crystal growth and structural characterization of four complex uranium oxides: CaUO4, β-Ca3UO6, K4CaU3O12, and K4SrU3O12, Solid State Sci. 2013, 17, 40-45.
K4CaU3O12	6	U3O8, CaaCO3	K2CO3	900 °C (48 h)	800 °C (5 °C/h)	orange	Alumina Crucible	water	2013	Read, C. M.; Bugaris, D. E.; zur Loye, H.-C., Single crystal growth and structural characterization of four complex uranium oxides: CaUO4, β-Ca3UO6, K4CaU3O12, and K4SrU3O12, Solid State Sci. 2013, 17, 40-45.
K4SrU3O12	6	U3O8, SrCO3	K2CO3	1050 °C (24 h)	800 °C (5 °C/h)	orange	Alumina Crucible	water	2013	Read, C. M.; Bugaris, D. E.; zur Loye, H.-C., Single crystal growth and structural characterization of four complex uranium oxides: CaUO4, β-Ca3UO6, K4CaU3O12, and K4SrU3O12, Solid State Sci. 2013, 17, 40-45.
K8U7O24	4,6	UO2, UO3, CaO	KF	950 °C (48 h)	750 °C (6 °C/h)	back	copper tube	water	2014	Read, C. M.; Smith, M. D.; zur Loye, H.-C., Single Crystal Growth and Structural Characterization of a Novel Mixed-Valent Ternary Uranium Oxide, K8U7O24, J. Chem. Crystallogr. 2014, 44, 604-608.
Cs2.2U5O16	5,6	UO3	CsCl	940 °C (13 h)	RT (naturally)	red	alumina crucible	water	2015	Morrison, G.; Read, C. M.; Smith, M. D.; zur Loye, H.-C., Flux Crystal Growth and Structural Analysis of Two Cesium Uranium Oxides, Cs2.2U5O16 and Cs2U4O13, Containing Multiple Cation-Cation Interactions, CrystEngComm 2015, 17, 1968-1974.
Cs2U4O13	6	UO3	CsCl	870 °C (6 d)	RT (naturally)	yellow	SiO2 tube vac	water	2015	Morrison, G.; Read, C. M.; Smith, M. D.; zur Loye, H.-C., Flux Crystal Growth and Structural Analysis of Two Cesium Uranium Oxides, Cs2.2U5O16 and Cs2U4O13, Containing Multiple Cation-Cation Interactions, CrystEngComm 2015, 17, 1968-1974.
Rb4U5O17	6	U3O8, RbNO3	Sb2O5	1300 °C (2 d)	RT	yellow	platinum		2009	Saad, S.; Obbade, S.; Renard, C.; Abraham, F., Synthesis, crystal structure, infrared and electrical conductivity of the layered rubidium uranate Rb4U5O17, J. Alloys Compd. 2007, 474, 68-72.
Ca(K6Ba2)U6O24	6	U3O8, Nb2O5, BaCO3	K2CO3	1200 °C (15 h)		orange	alumina		1987	Saine, M. C.; Gasperin, M.; Jove, J.; Cousson, A., Relation entre la structure cristalline d’un uranate de potassium K9U6O22.5 et les spectres mössbauer (237Np) des phases apparentées de neptunium, J. Less-Common Met. 1987, 132, 141-148.
K2U2O7	6	U3O8, Nb2O5	K2CO3	1247 °C		orange			1988	Jove, J.; Cousson, A.; Gasperin, M., Synthesis and crystal structure of K2U2O7 and Mössbauer (237Np) studies of K2Np2O7 and CaNpO4, J. Less-Common Met. 1988, 139, 345-350.
Na8Ca3.11U3.7O17.52	5,6	UO2, CuO	Na2CO3, CaCO3	1200 °C	800 °C (5 °C/h)				1989	Gasperin, M.; Cousson, A.; He, L.; Jove, J., Structure D’un oxyde D’uranium a valence mixte et etude par spectroscopie mossbauer (237Np) d’un oxyde isotype de neptunium, J. Less-Common Met. 1989, 152, 339-348.
Cs2U4O12		amorphous UO3	Cs2SO4	1150 °C (45 h)		black	Platinum cup	ethanol + methanol	1975	van Egmond, A. B., Investigations on cesium uranates—III: Crytal structures of Cs2U4O12, J. Inorg. Nucl. Chem. 1975, 37, 1929-1931.
BaUO4	6	solid state BaUO4	BaCl2	1030 °C (3 h)	quenched	deep orange	Platinum crucible	water	1976	Reis, A. H.; Hoekstra, H. R.; Gebert, E.; Peterson, S. W., Redetermination of the crystal structure of barium uranate, J. Inorg. Nucl. Chem. 1976, 38, 1481-1485.
Cs4U5O17	6	amorphous UO3	CsCl	700 °C (5 d)			gold boat		1976	van Egmond, A. B., Investigations on cesium uranates—V: The crystal structures of Cs2UO4, Cs4U5O17, Cs2U7O22 and Cs2U15O46, J. Inorg. Nucl. Chem. 1976, 38, 1649-1651.
MgUO4	6	U3O8	MgCl2	melt MgCl2 > 714 °C					1954	Zachariasen, W. H., Crystal chemical studies of the 5f-series of elements. XXI. The crystal structure of magnesium orthouranate, Acta Crystallogr. 1954, 7, 788-791.
CaUO4	6	U3O8 or UO3	CaCl2	1000 °C (30 min)	quenched	yellow green			1948	Zachariasen, W. H., Crystal chemical studies of the 5f-series of elements. IV. The crystal structure of Ca(UO2)O2 and Sr(UO2)O2, Acta Cryst. 1948, 1, 281-285.
SrUO4	6	U3O8 or UO3	SrCl2	1000 °C (30 min)	quenched	yellow green			1948	Zachariasen, W. H., Crystal chemical studies of the 5f-series of elements. IV. The crystal structure of Ca(UO2)O2 and Sr(UO2)O2, Acta Cryst. 1948, 1, 281-285.
α-Li2UO4	6	U3O8	LiCl						1961	Kovba, L. M.; Ippolitova, E. A.; Simanov, Y. P.; Spitsyn, V. I., Crystalline structure of uranates. I. Uranates with tetragonal layers (UO2)O2, Zh. Fiz. Khim. 1961, 35, 563-568.
K8U7O24		UO2, UO3, CaO	KF	950 °C (48 h)	750 °C (6 °C/h)	black	Copper	water	2014	Read, C. M.; Smith, M. D.; zur Loye, H.-C., Single Crystal Growth and Structural Characterization of a Novel Mixed-Valent Ternary Uranium Oxide, K8U7O24, J. Chem. Crystallogr. 2014, 44, 604-608.
MgUO4	6	U3O8	MgCl2			yellow			1954	Rüdorff, W.; Pfitzer, F., Notizen: Über erdalkaliuranate (VI) und ihre reduktionsprodukte, Z. Naturforsch. B 1954, 9, 568.
β-Li6UO6	6	U3O8	Li2O2	910 °C (3 d), 800 °C (5 d)	quenched	yellow	Au tube		1985	Wolf, R.; Hoppe, R., Neues über Oxouranate: Über α-Li6UO6. Mit einer Bemerkung über β-Li6UO6, Z. Anorg. Allg. Chem. 1985, 528, 129-137.
⍺-Li6UO6	6	U3O8	Li2O2	910 °C (3 d), 800 °C (5 d), 660 °C (7 d)	RT (5 °C/h)	yellow	Au tube		1985	Wolf, R.; Hoppe, R., Neues über Oxouranate: Über α-Li6UO6. Mit einer Bemerkung über β-Li6UO6, Z. Anorg. Allg. Chem. 1985, 528, 129-137.
Na2(UO4)	6	U3O8, Nb2O5	Na2CO3	1190 °C (15 h)	slow cool		Pt crucible		1985	Gasperin, M., Synthèse en monocristaux et structure du monouranate de sodium β-Na2UO4, J. Solid State Chem. 1985, 60, 316-319.
K9U6O22.5	6	U3O8, Nb2O5	K2CO3	1200 °C		orange			1987	Saine, M. C.; Gasperin, M.; Jove, J.; Cousson, A., Relation entre la structure cristalline d’un uranate de potassium K9U6O22.5 et les spectres mössbauer (237Np) des phases apparentées de neptunium, J. Less-Common Met. 1987, 132, 141-148.
Oxychalcogenides
UYb2O2S3	4	UOS, YbS	Sb2S3	1000 °C (8 d)	500 °C (2.6 °C/h), RT (60 °C/h)	dark-red	fused silica		2009	Jin, G. B.; Choi, E. S.; Ibers, J. A., Reinvestigation of the Uranium(3.5+) Rare-Earth Oxysulfides “(UO)2LnS3” (Ln = Yb, Y), Inorg. Chem. 2009, 48, 8227-8232.
UY2O2S3	4	UOS, Y2S3	Sb2S3	1000 °C (8 d)	500 °C (2.6 °C/h), RT (60 °C/h)	dark-red	fused silica		2009	Jin, G. B.; Choi, E. S.; Ibers, J. A., Reinvestigation of the Uranium(3.5+) Rare-Earth Oxysulfides “(UO)2LnS3” (Ln = Yb, Y), Inorg. Chem. 2009, 48, 8227-8232.
Na2Ba2((UO2)S4)	6	U, BaS, S	Na2O2	600 °C (4 d)	300 °C (2 °C/h), RT (5 °C/h)	black	fused silica	none	2013	Ward, M. D.; Klingsporn, J. M.; Ibers, J. A., Synthesis and Structure of the [(UO2)S4]6- Anion: A Cation-Stabilized Uranyl Sulfide, Inorg. Chem. 2013, 52, 10220-10222.
UY4O3S5	4	UOS, Y2S3	Sb2S3	1000 °C (8 d)	500 °C (2.6 °C/h), RT (60 °C/h)	red	fused silica		2009	Jin, G. B.; Choi, E. S.; Wells, D. M.; Ibers, J. A., Synthesis and characterization of the new uranium yttrium oxysulfide UY4O3S5, J. Solid State Chem. 2009, 182, 1861-1866.
UTa2O(S2)3Cl6	4	UCl4	TaS2	610 °C (1 d)	200 °C (4.1 °C/h), RT (4.7 °C/h)	orange	fused silica		2010	Wells, D. M.; Chan, G. H.; Ellis, D. E.; Ibers, J. A., UTa2O(S2)3Cl6: A ribbon structure containing a heterobimetallic 5d–5f M_3_ cluster, J. Solid State Chem. 2010, 183, 285-290.
UYb2O2Se3	4	UOSe, YbSe, Se	Sb2Se3	950 °C (7 d)	650 °C (3 °C/h)	black	fused silica		2012	Raw, A. D.; Ibers, J. A., Syntheses and crystal structures of the quaternary uranium lanthanide oxyselenides UYb2O2Se3 and U2Ln2O4Se3 (Ln= Pr, Sm, Gd), J. Solid State Chem. 2012, 186, 177-181.
U2Pr2O4Se3	4	USe2, Pr6O11, Se	Sb2Se3	1000 °C (100 h), 800 °C (72 h)	800 °C (2 °C/h), 700 °C (2.8 °C/h), RT (56.2 °C/h)	black	fused silica		2012	Raw, A. D.; Ibers, J. A., Syntheses and crystal structures of the quaternary uranium lanthanide oxyselenides UYb2O2Se3 and U2Ln2O4Se3 (Ln= Pr, Sm, Gd), J. Solid State Chem. 2012, 186, 177-181.
U2Sm2O4Se3	4	U, Sm2Se3, SeO2, Se	Sb2Se3	1000 °C (7 d)	700 °C (3 °C/h)	black	fused silica		2012	Raw, A. D.; Ibers, J. A., Syntheses and crystal structures of the quaternary uranium lanthanide oxyselenides UYb2O2Se3 and U2Ln2O4Se3 (Ln= Pr, Sm, Gd), J. Solid State Chem. 2012, 186, 177-181.
U2Gd2O4Se3	4	USe2, Gd2O3, Se	Sb2Se3	1000 °C (7 d)	800 °C (2 °C/h)	black	fused silica		2012	Raw, A. D.; Ibers, J. A., Syntheses and crystal structures of the quaternary uranium lanthanide oxyselenides UYb2O2Se3 and U2Ln2O4Se3 (Ln= Pr, Sm, Gd), J. Solid State Chem. 2012, 186, 177-181.
U7O2Se12	4	U, Ir3Se8	CsCl	900 °C (6 h), 800 °C (96 h)	800 °C (8.3 °C/h), 500 °C (2 °C/h), RT (9.9 °C/h)	black	fused silica		2014	Ward, M. D.; Ibers, J. A., The Synthesis and Crystal Structure of U7O2Se12, Z. Anorg. Allg. Chem. 2014, 640, 1585-1588.
UOS	4	UOS powder (UO2, C, S)	Sb2S3	1000 °C (7 d)	700 °C (3.1 °C/h), RT (67.5 °C/h)	black	fused silica		2010	Jin, G. B.; Raw, A. D.; Skanthakumar, S.; Haire, R. G.; Soderholm, L.; Ibers, J. A., Single-crystal structures of uranium and neptunium oxychalcogenides AnOQ (An= U, Np; Q= S, Se), J. Solid State Chem. 2010, 183, 547-550.
UOSe	4	UOSe powder (U, Se, SeO2, Pd)	Sb2Se3	1000 °C (7 d)	650 °C (3.6 °C/h), RT (62.5 °C/h)	black	fused silica		2010	Jin, G. B.; Raw, A. D.; Skanthakumar, S.; Haire, R. G.; Soderholm, L.; Ibers, J. A., Single-crystal structures of uranium and neptunium oxychalcogenides AnOQ (An= U, Np; Q= S, Se), J. Solid State Chem. 2010, 183, 547-550.
UEr2O2S3	4	UOS, Er, S	Sb2S3	1000 °C (7 d)	600 °C (2 °C/h)	black	fused silica		2012	Raw, A. D.; Ibers, J. A., Synthesis and structural characterization of the new compound UEr2O2S3 and the evidence for the old compound U2ErO2S3, J. Solid State Chem. 2012, 187, 282-285.
Oxychlorides
K4U5O16Cl2	6	UO3	KCl	900 °C (20 h)	550 °C (6 °C/h)	orange	SiO2 tube vac	water	2014	Read, C. M.; Yeon, J.; Smith, M. D.; zur Loye, H.-C., Crystal Growth, Structural Characterization, and Optical Properties of Uranium(VI) Containing Oxychlorides, A4U5O16Cl2 (A = K, Rb), Cs5U7O22Cl3, and AUO3Cl (A = Rb, Cs), Cryst. Eng. Comm. 2014, 7259-7267.
Rb4U5O16Cl2	6	UO3	RbCl	900 °C (20 h)	550 °C (6 °C/h)	orange	SiO2 tube vac	water	2014	Read, C. M.; Yeon, J.; Smith, M. D.; zur Loye, H.-C., Crystal Growth, Structural Characterization, and Optical Properties of Uranium(VI) Containing Oxychlorides, A4U5O16Cl2 (A = K, Rb), Cs5U7O22Cl3, and AUO3Cl (A = Rb, Cs), Cryst. Eng. Comm. 2014, 7259-7267.
Cs5U7O22Cl3	6	UO3	CsCl	900 °C (12 h)	550 °C (6 °C/h)	orange	Alumina Crucible	water	2014	Read, C. M.; Yeon, J.; Smith, M. D.; zur Loye, H.-C., Crystal Growth, Structural Characterization, and Optical Properties of Uranium(VI) Containing Oxychlorides, A4U5O16Cl2 (A = K, Rb), Cs5U7O22Cl3, and AUO3Cl (A = Rb, Cs), Cryst. Eng. Comm. 2014, 7259-7267.
RbUO3Cl	6	UO3	RbCl	900 °C (20 h)	550 °C (6 °C/h)	yellow	SiO2 tube vac	water	2014	Read, C. M.; Yeon, J.; Smith, M. D.; zur Loye, H.-C., Crystal Growth, Structural Characterization, and Optical Properties of Uranium(VI) Containing Oxychlorides, A4U5O16Cl2 (A = K, Rb), Cs5U7O22Cl3, and AUO3Cl (A = Rb, Cs), Cryst. Eng. Comm. 2014, 7259-7267.
CsUO3Cl	6	UO3	CsCl	900 °C (20 h)	550 °C (6 °C/h)	yellow	SiO2 tube vac	water	2014	Read, C. M.; Yeon, J.; Smith, M. D.; zur Loye, H.-C., Crystal Growth, Structural Characterization, and Optical Properties of Uranium(VI) Containing Oxychlorides, A4U5O16Cl2 (A = K, Rb), Cs5U7O22Cl3, and AUO3Cl (A = Rb, Cs), Cryst. Eng. Comm. 2014, 7259-7267.
KUO3Cl	6	U3O8, CoCl2•6H2O	KCl	900 °C (12 h)	550 °C (6 °C/h)	yellow	Alumina Crucible	water	2015	Read, C. M.; Smith, M. D.; zur Loye, H.-C., Synthesis, Crystal Structure, and Optical Properties of a New Complex Uranium Oxychloride, KUO3Cl, J. Chem. Crystallogr. 2015, 45, 440-444.
Csx(UO2)OClx	6	amorphous UO3	CsCl	600 °C	heating 300 °C to 600 °C in several weeks		evacuated glass capsule		1964	Allpress, J. G.; Wadsley, A. D., The Crystal Structure of Caesium Uranyl Oxychloride Csx(UO2)OClx (x approximately 0.9), Acta Crystallogr. 1964, 17, 41-45.
Cs2UNb6Cl15O3	3	UCl4, NbCl5, Nb2O5, Nb	CsCl	700 °C (7 d)			evacuted silica tube		1997	Cordier, S.; Perrin, C.; Sergent, M., New series of niobium oxychlorides, M2RENb6Cl15O3 (M = monovalent cation, RE = rare earth) and M2UNb6Cl15O3. The crystal structure of Cs2UNb6Cl15O3, Mater. Res. Bull. 1997, 32, 25-33.
Borates
LiBUO5	6	U3O8, Li2CO3	B2O3	1080 °C (15 h)		yellow		boiling water	1990	Gasperin, M., Synthèse et structure du borouranate de lithium LiBUO5, Acta Crystallogr. C 1990, 46, 372-374.
CaB2U2O10	6	U3O8, CaCO3	B2O3	1150 °C (15 h)		yellow		boiling water	1987	Gasperin, M., Synthèse et structure du borouranate de calcium: CaB2U2O10, Acta Crystallogr. C 1987, 43, 1247-1250.
Ni7B4UO16	6	U3O8, NiO	B2O3	1100 °C (15 h)		black		boiling water	1989	Gasperin, M., Synthèse et structure du tétraborouranate de nickel, Ni7B4UO16, Acta Crystallogr. C 1989, 45, 981-983.
UB2O6	6	(NH4)U2O7	B2O3	850-900 °C (1-4 weeks)	none		Pt crucible	methanol	1980	Holcombe, C. E.; Johnson, D. H., Characterization of uranium borate (UB2O6) crystals, J.Cryst. Growth 1980, 49, 207-210.
NaBUO5	6	U3O8, Na2CO3	B2O3	1100 °C		light yellow		boiling water	1988	Gasperin, M., Synthèse et structure du borouranate de sodium, NaBUO5, Acta Crystallogr. C 1988, 44, 415-416.
MgB2UO7	6	U3O8, MgCO3	B2O3	1200 °C		colorless		boiling water	1987	Gasperin, M., Synthèse et structure du diborouranate de magnésium, MgB2UO7, Acta Crystallogr. C 1987, 43, 2264-2266.
Sr[(UO2)2(B2O5)O]	6	UO2(NO3)2∙6H2O, Sr(NO3)2	H3BO3/Li2B4O7	965 °C (10 h)	450 °C (5 °C/h)	orange	Platinum		2016	Hao, Y.; Klepov, V. V.; Murphy, G. L.; Modolo, G.; Bosbach, D.; Albrecht-Schmitt, T. E.; Kennedy, B. J.; Wang, S.; Alekseev, E. V., Influence of Synthetic Conditions on Chemistry and Structural Properties of Alkaline Earth Uranyl Borates, Cryst. Growth Des. 2016, 16, 5923-5931.
Cs6[(UO2)12(BO3)8O3](H2O)6	6	UO2(NO3)2∙6H2O, CsNO3	B2O3	1000 °C (5 h)	600 °C (5 °C/h), 450 °C (10 °C/h)	yellow	Platinum		2017	Hao, Y.; Kegler, P.; Bosbach, D.; Albrecht-Schmitt, T. E.; Wang, S.; Alekseev, E. V., Divergent Structural Chemistry of Uranyl Borates Obtained from Solid State and Hydrothermal Conditions, Cryst. Growth Des. 2017, 17, 5898-5907.
Rb6[(UO2)12(BO3)8O3](H2O)6	6	UO2(NO3)2∙6H2O, RbNO3	B2O3	1000 °C (5 h)	600 °C (5 °C/h), 450 °C (10 °C/h)	yellow	Platinum		2017	Hao, Y.; Kegler, P.; Bosbach, D.; Albrecht-Schmitt, T. E.; Wang, S.; Alekseev, E. V., Divergent Structural Chemistry of Uranyl Borates Obtained from Solid State and Hydrothermal Conditions, Cryst. Growth Des. 2017, 17, 5898-5907.
K4Sr4[(UO2)13(B2O5)2(BO3)2O12]	6	UO2(NO3)2∙6H2O, SrCO3	H3BO3/K2B4O7	980 °C (5 h)	550 °C (5 °C/h)	yellow	Platinum		2017	Hao, Y.; Kegler, P.; Bosbach, D.; Albrecht-Schmitt, T. E.; Wang, S.; Alekseev, E. V., Divergent Structural Chemistry of Uranyl Borates Obtained from Solid State and Hydrothermal Conditions, Cryst. Growth Des. 2017, 17, 5898-5907.
(UO2)(B2O4)	6	UO2(NO3)2	H3BO3	190 °C	RT	yellow	PTFE	water, methanol	2010	Wang, S.; Alekseev, E. V.; Stritzinger, J. T.; Depmeier, W.; Albrecht-Schmitt, T. E., How are Centrosymmetric and Noncentrosymmetric Structures Achieved in Uranyl Borates?, Inorg. Chem. 2010, 49, 2948-2953.
Silicates
Rb2USiO6	6	U3O8, SiO2	RbF	900 °C (12 h)	700 °C (6 °C/h)	orange	Silver Crucible	water	2015	Read, C. M.; Smith, M. D.; Withers, R. L.; zur Loye, H.-C., Flux Crystal Growth and Optical Properties of Two Uranium-Containing Silicates: A2USiO6 (A = Cs, Rb), Inorg. Chem. 2015, 54, 4520-4525.
Cs2USiO6	6	U3O8, SiO2	CsF	900 °C (12 h)	700 °C (6 °C/h)	orange	Silver Crucible	water	2015	Read, C. M.; Smith, M. D.; Withers, R. L.; zur Loye, H.-C., Flux Crystal Growth and Optical Properties of Two Uranium-Containing Silicates: A2USiO6 (A = Cs, Rb), Inorg. Chem. 2015, 54, 4520-4525.
K4CaUSi4O14	6	U3O8, SiO2	KF/CaF2	900 °C (12 h)	700 °C (6 °C/h)	yellow	Silver Crucible	water	2015	Morrison, G.; Smith, M. D.; Tran, T. T.; Halasyamani, P. S.; zur Loye, H.-C., Synthesis and Structure of the New Pentanary Uranium (VI) Silicate, K4CaUSi4O14, a Member of a Structural Family Related to Fresnoite, CrystEngComm 2015, 17, 4218-4224.
K2USi6O15	4	UO2, SiO2	KF/KCl	900 °C (12 h)	700 °C (6 °C/h)	light green	Copper tube	water	2015	Morrison, G.; Ramanantoanina, H.; Smith, M. D.; Urland, W.; zur Loye, H.-C., Crystal Structure and Intriguing Low Temperature Structure and Color Transition in A2USi6O15 (A = K, Rb), Inorg. Chem. 2015, 54, 5504-5511.
Rb2USi6O15	4	UO2, SiO2	RbF/RbCl	900 °C (12 h)	500 °C (6 °C/h)	light green	Copper tube	water	2015	Morrison, G.; Ramanantoanina, H.; Smith, M. D.; Urland, W.; zur Loye, H.-C., Crystal Structure and Intriguing Low Temperature Structure and Color Transition in A2USi6O15 (A = K, Rb), Inorg. Chem. 2015, 54, 5504-5511.
Cs2USi6O15	4	UO2, SiO2	CsF/CsCl	900 °C (12 h)	400 °C (6 °C/h)	light green	Copper tube	water	2015	Morrison, G.; Ramanantoanina, H.; Smith, M. D.; Urland, W.; zur Loye, H.-C., Crystal Structure and Intriguing Low Temperature Structure and Color Transition in A2USi6O15 (A = K, Rb), Inorg. Chem. 2015, 54, 5504-5511.
[NaK6F][(UO2)3(Si2O7)2]	6	U3O8, SiO2	KF/NaF	900 °C (24 h)	600 °C (6 °C/h)	yellow	Silver Crucible	water	2015	Morrison, G.; zur Loye, H.-C., Flux Growth of [NaK6F][(UO2)3(Si2O7)2] and [KK6Cl][(UO2)3(Si2O7)2]: The Effect of Surface Area to Volume Ratios on Reaction Products, Cryst. Growth Des. 2016, 16, 1294-1299.
[KK6Cl][(UO2)3(Si2O7)2]	6	U3O8, SiO2	KF/KCl	900 °C (24 h)	600 °C (6 °C/h)	yellow	Silver Crucible	water	2016	Morrison, G.; zur Loye, H.-C., Flux Growth of [NaK6F][(UO2)3(Si2O7)2] and [KK6Cl][(UO2)3(Si2O7)2]: The Effect of Surface Area to Volume Ratios on Reaction Products, Cryst. Growth Des. 2016, 16, 1294-1299.
K8(K5F)U6Si8O40	6	U3O8, SiO2	KF/KBr	800 °C (12 h)	500 °C (6 °C/h)	light yellow	Silver Crucible	water	2016	Morrison, G.; Tran, T. T.; Halasyamani, P. S.; zur Loye, H.-C., K8(K5F)U6Si8O40: An Intergrowth Uranyl Silicate, Inorg. Chem. 2016, 55, 3215-3217.
[Cs3F][(UO2)(Si4O10)]	6	UF4, SiO2	CsCl	800 °C (12 h)	400 °C (6 °C/h)	yellow green	Silver Tube	water	2016	Morrison, G.; Smith, M. D.; zur Loye, H.-C., Understanding the Formation of Salt-Inclusion Phases: An Enhanced Flux Growth Method for the Targeted Synthesis of Salt-Inclusion Cesium Halide Uranyl Silicates, J. Am. Chem. Soc. 2016, 138, 7121-7129.
[Cs2Cs5F][(UO2)3(Si2O7)2]	6	UF4, SiO2	CsCl	800 °C (12 h)	400 °C (6 °C/h)	yellow	Silver Tube	water	2016	Morrison, G.; Smith, M. D.; zur Loye, H.-C., Understanding the Formation of Salt-Inclusion Phases: An Enhanced Flux Growth Method for the Targeted Synthesis of Salt-Inclusion Cesium Halide Uranyl Silicates, J. Am. Chem. Soc. 2016, 138, 7121-7129.
[Cs2Cs5F][(UO2)2(Si6O17)]	6	UO2, SiO2	CsCl	800 °C (12 h)	400 °C (6 °C/h)	yellow	Silver Tube	water	2016	Morrison, G.; Smith, M. D.; zur Loye, H.-C., Understanding the Formation of Salt-Inclusion Phases: An Enhanced Flux Growth Method for the Targeted Synthesis of Salt-Inclusion Cesium Halide Uranyl Silicates, J. Am. Chem. Soc. 2016, 138, 7121-7129.
[Cs9Cs6Cl][(UO2)7(Si6O17)2(Si4O12)]	6	UF4, SiO2	CsCl	800 °C (12 h)	400 °C (6 °C/h)	yellow	Silver Tube	water	2016	Morrison, G.; Smith, M. D.; zur Loye, H.-C., Understanding the Formation of Salt-Inclusion Phases: An Enhanced Flux Growth Method for the Targeted Synthesis of Salt-Inclusion Cesium Halide Uranyl Silicates, J. Am. Chem. Soc. 2016, 138, 7121-7129.
Rb2(UO2)Si2O6	6	UF4, SiO2	RbF/RbCl	800 °C (12 h)	400 °C (6 °C/h)	yellow	Silver Crucible	water	2017	Morrison, G.; Smith, M. D.; zur Loye, H.-C., Flux versus Hydrothermal Growth: Polymorphism of A2(UO2)Si2O6 (A = Rb, Cs), Inorg. Chem. 2017, 56, 1053-1056.
Cs2(UO2)Si2O6	6	UF4, SiO2	CsF/CsCl	800 °C (12 h)	400 °C (6 °C/h)	yellow	Silver Crucible	water	2017	Morrison, G.; Smith, M. D.; zur Loye, H.-C., Flux versus Hydrothermal Growth: Polymorphism of A2(UO2)Si2O6 (A = Rb, Cs), Inorg. Chem. 2017, 56, 1053-1056.
(K3Cs4F)((UO2)3(Si2O7)2)	6	UO3, SiO2	CsF/KF	750 °C (12 h)	550 °C (2 °C/h)	yellow	platinum	water	2009	Lee, C.-S.; Wang, S.-L.; Chen, Y.-H.; Lii, K.-H., Flux Synthesis of Salt-Inclusion Uranyl Silicates: [K3Cs4F][(UO2)3(Si2O7)2] and [NaRb6F][(UO2)3(Si2O7)2], Inorg. Chem. 2009, 48, 8357-8361.
(NaRb6F)((UO2)3(Si2O7)2)	6	UO3, SiO2	RbF/NaF	750 °C (12 h)	550 °C (2 °C/h)	yelow	platinum	water	2009	Lee, C.-S.; Wang, S.-L.; Chen, Y.-H.; Lii, K.-H., Flux Synthesis of Salt-Inclusion Uranyl Silicates: [K3Cs4F][(UO2)3(Si2O7)2] and [NaRb6F][(UO2)3(Si2O7)2], Inorg. Chem. 2009, 48, 8357-8361.
(Ca0.5Na0.5)2NaUSi8O20	4	UO2, CaSiO3	Na2WO4	730 °C (140 h)	430 °C (2 °C/h), RT (67.5 °C/h)	green	Silica	water	2015	Jin, G. B.; Soderholm, L., Solid-state syntheses and single-crystal characterizations of three tetravalent thorium and uranium silicates, J. Solid State Chem. 2015, 221, 405-410.
Germanate
K4((UO2)Eu2(Ge2O7)2)	6	UO3, Eu2O3, GeO2	MoO3-KF	950 °C (48 h)	750 °C (2 °C/h)	yellow	platinum	hot water	2013	Liu, S.-P.; Chen, M.-L.; Chang, B.-C.; Lii, K.-H., Flux Synthesis, Crystal Structure, and Photoluminescence of a Heterometallic Uranyl-Europium Germanate with U=O−Eu Linkage: K4[(UO2)Eu2(Ge2O7)2], Inorg. Chem. 2013, 52, 3990-3994.
[Cs2Cs5F][(UO2)3(Ge2O7)2]	6	UF4, GeO2	CsF	875 °C (12h)	400 °C (6 °C/h)	yellow	Silver Tube	water	2018	Juillerat, C. A.; Moore, E. E.; Besmann, T. M.; zur Loye, H.-C., Versatile Uranyl Germanate Framework Hosting Twelve Different Alkali Halide 1D Salt Inclusions, Inorg. Chem. 2018, 57, 11606-11615.
[Cs6Ag2Cl2][(UO2)3(Ge2O7)2]	6	UF4, GeO2	CsCl	875 °C (12h)	400 °C (6 °C/h)	yellow	Silver Tube	water	2018	Juillerat, C. A.; Moore, E. E.; Besmann, T. M.; zur Loye, H.-C., Versatile Uranyl Germanate Framework Hosting Twelve Different Alkali Halide 1D Salt Inclusions, Inorg. Chem. 2018, 57, 11606-11615.
[Cs6Na2Cl2][(UO2)3(Ge2O7)2]	6	UO2(NO3)2, GeO2	CsF/CsCl/NaCl	900 °C (10h)	500 °C (5 °C/h)	green	platinum		2018	Li, H.; Langer, E. M.; Kegler, P.; Modolo, G.; Alekseev, E. V., Formation of Open Framework Uranium Germanates: The Influence of Mixed Molten Flux and Charge Density Dependence in U-Silicate and U-Germanate Families, Inorg. Chem. 2018, 57, 11201-11216.
[Cs6AgxNa2-xCl2][(UO2)3(Ge2O7)2]	6	UF4, GeO2	CsF/CsCl	875 °C (12h)	400 °C (6 °C/h)	yellow	Silver Tube	water	2018	Juillerat, C. A.; Moore, E. E.; Besmann, T. M.; zur Loye, H.-C., Versatile Uranyl Germanate Framework Hosting Twelve Different Alkali Halide 1D Salt Inclusions, Inorg. Chem. 2018, 57, 11606-11615.
[Cs6K2-xAgxCl2][(UO2)3(Ge2O7)2]	6	UF4, GeO2	CsF/CsCl	875 °C (12h)	400 °C (6 °C/h)	yellow	Silver Tube	water	2018	Juillerat, C. A.; Moore, E. E.; Besmann, T. M.; zur Loye, H.-C., Versatile Uranyl Germanate Framework Hosting Twelve Different Alkali Halide 1D Salt Inclusions, Inorg. Chem. 2018, 57, 11606-11615.
[KK6Cl][(UO2)3(Ge2O7)2]	6	UF4, GeO2	KF/KCl	875 °C (12h)	400 °C (6 °C/h)	yellow	Silver Tube	water	2018	Juillerat, C. A.; Moore, E. E.; Besmann, T. M.; zur Loye, H.-C., Versatile Uranyl Germanate Framework Hosting Twelve Different Alkali Halide 1D Salt Inclusions, Inorg. Chem. 2018, 57, 11606-11615.
[NaK6Cl][(UO2)3(Ge2O7)2]	6	UO2(NO3)2, GeO2	Na2CO3/KF/KCl	900 °C (10h)	500 °C (5 °C/h)	green	platinum		2018	Li, H.; Langer, E. M.; Kegler, P.; Modolo, G.; Alekseev, E. V., Formation of Open Framework Uranium Germanates: The Influence of Mixed Molten Flux and Charge Density Dependence in U-Silicate and U-Germanate Families, Inorg. Chem. 2018, 57, 11201-11216.
[KK6Br0.6F0.4][(UO2)3(Ge2O7)2]	6	UF4, GeO2	KF/KBr	875 °C (12h)	400 °C (6 °C/h)	yellow	Silver Tube	water	2018	Juillerat, C. A.; Moore, E. E.; Besmann, T. M.; zur Loye, H.-C., Versatile Uranyl Germanate Framework Hosting Twelve Different Alkali Halide 1D Salt Inclusions, Inorg. Chem. 2018, 57, 11606-11615.
[Na0.9Rb6.1F][(UO2)3(Ge2O7)2]	6	UF4, GeO2	RbF/NaF	875 °C (12h)	400 °C (6 °C/h)	yellow	Silver Tube	water	2018	Juillerat, C. A.; Moore, E. E.; Besmann, T. M.; zur Loye, H.-C., Versatile Uranyl Germanate Framework Hosting Twelve Different Alkali Halide 1D Salt Inclusions, Inorg. Chem. 2018, 57, 11606-11615.
[KK1.8Cs4.2F] [(UO2)3(Ge2O7)2]	6	UF4, GeO2	CsF/KF	875 °C (12h)	400 °C (6 °C/h)	yellow	Silver Tube	water	2018	Juillerat, C. A.; Moore, E. E.; Besmann, T. M.; zur Loye, H.-C., Versatile Uranyl Germanate Framework Hosting Twelve Different Alkali Halide 1D Salt Inclusions, Inorg. Chem. 2018, 57, 11606-11615.
[Cs6Cs0.71Cl0.71][(UO2)3O3(Ge2O7)]	6	UF4, GeO2	CsCl	875 °C (12h)	400 °C (6 °C/h)	yellow	Silver Tube	water	2018	Juillerat, C. A.; Moore, E. E.; Besmann, T. M.; zur Loye, H.-C., Versatile Uranyl Germanate Framework Hosting Twelve Different Alkali Halide 1D Salt Inclusions, Inorg. Chem. 2018, 57, 11606-11615.
K2(UO2)GeO4	6	UO2(NO3)2, GeO2	K2CO3/WO3	980 °C (5h)	500 °C (5 °C/h)	green	platinum		2018	Li, H.; Langer, E. M.; Kegler, P.; Modolo, G.; Alekseev, E. V., Formation of Open Framework Uranium Germanates: The Influence of Mixed Molten Flux and Charge Density Dependence in U-Silicate and U-Germanate Families, Inorg. Chem. 2018, 57, 11201-11216.
K6(UO2)3Ge8O22	6	UO2(NO3)2, GeO2	K2CO3/MoO3/PbO	1000 °C (5h)	500 °C (6 °C/h)	green	platinum		2018	Li, H.; Langer, E. M.; Kegler, P.; Modolo, G.; Alekseev, E. V., Formation of Open Framework Uranium Germanates: The Influence of Mixed Molten Flux and Charge Density Dependence in U-Silicate and U-Germanate Families, Inorg. Chem. 2018, 57, 11201-11216.
α-Cs2(UO2)Ge2O6	6	UO2(NO3)2, GeO2	Cs2CO3/V2O5/CsF	980 °C (5h)	500 °C (5 °C/h)	green	platinum		2018	Li, H.; Langer, E. M.; Kegler, P.; Modolo, G.; Alekseev, E. V., Formation of Open Framework Uranium Germanates: The Influence of Mixed Molten Flux and Charge Density Dependence in U-Silicate and U-Germanate Families, Inorg. Chem. 2018, 57, 11201-11216.
β-Cs2(UO2)Ge2O6	6	UO2(NO3)2, GeO2	CsCl/CsF	750 °C (12h)	500 °C (5 °C/h)	green	platinum		2018	Li, H.; Langer, E. M.; Kegler, P.; Modolo, G.; Alekseev, E. V., Formation of Open Framework Uranium Germanates: The Influence of Mixed Molten Flux and Charge Density Dependence in U-Silicate and U-Germanate Families, Inorg. Chem. 2018, 57, 11201-11216.
Cs2(UO2)GeO4	6	UO2(NO3)2, GeO2	Cs2CO3/V2O5/CsF	980 °C (5h)	500 °C (5 °C/h)	green	platinum		2018	Li, H.; Langer, E. M.; Kegler, P.; Modolo, G.; Alekseev, E. V., Formation of Open Framework Uranium Germanates: The Influence of Mixed Molten Flux and Charge Density Dependence in U-Silicate and U-Germanate Families, Inorg. Chem. 2018, 57, 11201-11216.
Phosphates
Rb6[(UO2)7O4(PO4)4]	6	UF4, AlPO4	RbCl	875 °C (12 h)	450 °C (6 °C/h)	orange	Alumina Crucible	water	2018	Juillerat, C. A.; Moore, E. E.; Besmann, T. B.; zur Loye, H.-C., Observation of an Unusual Uranyl Cation-Cation Interaction in the Strongly Fluorescent Layered Uranyl Phosphates Rb6[(UO2)7O4(PO4)4] and Cs6[(UO2)7O4(PO4)4], Inorg. Chem. 2018, 57, 3675-3678.
Cs6[(UO2)7O4(PO4)4]	6	UF4, AlPO4	CsCl	875 °C (12 h)	450 °C (6 °C/h)	orange	Alumina Crucible	water	2018	Juillerat, C. A.; Moore, E. E.; Besmann, T. B.; zur Loye, H.-C., Observation of an Unusual Uranyl Cation-Cation Interaction in the Strongly Fluorescent Layered Uranyl Phosphates Rb6[(UO2)7O4(PO4)4] and Cs6[(UO2)7O4(PO4)4], Inorg. Chem. 2018, 57, 3675-3678.
A4(PO4)2[(UO2)3O2]	6	UF4, AlPO4	Acl	875 °C (12 h)	450 °C (6 °C/h)	yellow	Alumina Crucible	water	2018	Juillerat, C. A.; Moore, E. E.; Kocevski, V.; Besmann, T. M.; zur Loye, H.-C., A Family of Layered Phosphates Crystallizing in a Rare Geometrical Isomer of the Phosphuranylite Topology: Synthesis, Characterization, and Computational Modeling of A4[(UO2)3O2(PO4)2] (A = alkali metals) Exhibiting Intra-layer Ion Exchange, Inorg. Chem. 2018, 57, 4726-4738.
Li6((UO2)12(PO4)8(P4O13))	6	UO2(NO3)2, Li2CO3	P2O5	820 °C (no dwell)	50 °C (5 °C/h)	dark orange	platinum		2009	Alekseev, E. V.; Krivovichev, S. V.; Depmeier, W., Crystal chemistry of anhydrous Li uranyl phosphates and arsenates. II. Polymorphism and structure topology: Synthesis and crystal structures of a-Li[(UO2)(PO4)], a-Li[(UO2)(AsO4)], b-Li[(UO2)(AsO4)] and Li2[(UO2)3(P2O7)2], J. Solid State Chem. 2009, 182, 2977-2984.
Li((UO2)(PO4))	6	UO2(NO3)2, Li2CO3	P2O5	820 °C (no dwell)	50 °C (5 °C/h)	green-yellow	platinum		2008	Alekseev, E. V.; Krivovichev, S. V.; Malcherek, T.; Depmeier, W., Crystal chemistry of anhydrous Li uranyl phosphates and arsenates. I. Polymorphism and structure topology: Synthesis and crystal structures of a-Li[(UO2)(PO4)], a-Li[(UO2)(AsO4)], b-Li[(UO2)(AsO4)] and Li2[(UO2)3(P2O7)2], J. Solid State Chem. 2008, 181, 3010-3015.
Li2((UO2)3(P2O7)2)	6	UO2(NO3)2, Li2CO3	P2O5	820 °C (no dwell)	50 °C (5 °C/h)	green-yellow	platinum		2008	Alekseev, E. V.; Krivovichev, S. V.; Malcherek, T.; Depmeier, W., Crystal chemistry of anhydrous Li uranyl phosphates and arsenates. I. Polymorphism and structure topology: Synthesis and crystal structures of a-Li[(UO2)(PO4)], a-Li[(UO2)(AsO4)], b-Li[(UO2)(AsO4)] and Li2[(UO2)3(P2O7)2], J. Solid State Chem. 2008, 181, 3010-3015.
Cs3(UO2)2(PO4)O2	6	(UO2)3(PO4)2•(H2O)4	CsI	750 °C (10 h)	RT (7 °C/h)	yellow	platinum		2013	Yagoubi, S.; Renard, C.; Abraham, F.; Obbade, S., Molten salt flux synthesis and crystal structure of a new open-framework uranyl phosphate Cs3(UO2)2(PO4)O2: Spectroscopic characterization and cationic mobility studies, J. Solid State Chem. 2013, 200, 13-21.
𝛼-Ba2[UO2(PO4)2]	6	UO2(NO3)2∙6H2O, BaCO3, BPO4	B2O3	1000 °C (2 h)	300 °C (7 °C/h)	green	Platinum		2014	Wu, S.; Kowalski, P. M.; Yu, N.; Malcherek, T.; Depmeier, W.; Bosbach, D.; Wang, S.; Suleimanov, E. V.; Albrecht-Schmitt, T. E.; Alekseev, E. V., Highly Distorted Uranyl Ion Coordination and One/Two-Dimensional Structural Relationship in the Ba2[UO2(TO4)2] (T = P, As) System: An Experimental and Computational Study, Inorg. Chem. 2014/07/21 2014, 53, 7650-7660.
𝛽-Ba2[UO2(PO4)2]	6	UO2(NO3)2∙6H2O, BaCO3, BPO4	H3BO3	1300 °C (2 h)	300 °C (7 °C/h)	yellow	Platinum		2014	Wu, S.; Kowalski, P. M.; Yu, N.; Malcherek, T.; Depmeier, W.; Bosbach, D.; Wang, S.; Suleimanov, E. V.; Albrecht-Schmitt, T. E.; Alekseev, E. V., Highly Distorted Uranyl Ion Coordination and One/Two-Dimensional Structural Relationship in the Ba2[UO2(TO4)2] (T = P, As) System: An Experimental and Computational Study, Inorg. Chem. 2014/07/21 2014, 53, 7650-7660.
𝛼-K[(UO2)(P3O9)]	6	UO2(NO3)2∙6H2O, K2CO3	P2O5	850 °C (no dwell)	150 °C (5 °C/h)	yellow	Platinum		2008	Alekseev, E. V.; Krivovichev, S. V.; Depmeier, W.; Knorr, K., Complex Topology of Uranyl Polyphosphate Frameworks: Crystal Structures of α-, β-K[(UO2)(P3O9)] and K[(UO2)2(P3O10)], Z. Anorg. Allg. Chem. 2008, 634, 1527-1532.
𝛽-K[(UO2)(P3O9)]	6	UO2(NO3)2∙6H2O, K2CO3	P2O5	850 °C (no dwell)	150 °C (5 °C/h)	yellow	Platinum		2008	Alekseev, E. V.; Krivovichev, S. V.; Depmeier, W.; Knorr, K., Complex Topology of Uranyl Polyphosphate Frameworks: Crystal Structures of α-, β-K[(UO2)(P3O9)] and K[(UO2)2(P3O10)], Z. Anorg. Allg. Chem. 2008, 634, 1527-1532.
K[(UO2)2(P3O10)]	6	UO2(NO3)2∙6H2O, K2CO3	P2O5	850 °C (no dwell)	150 °C (5 °C/h)	green	Platinum		2008	Alekseev, E. V.; Krivovichev, S. V.; Depmeier, W.; Knorr, K., Complex Topology of Uranyl Polyphosphate Frameworks: Crystal Structures of α-, β-K[(UO2)(P3O9)] and K[(UO2)2(P3O10)], Z. Anorg. Allg. Chem. 2008, 634, 1527-1532.
Cs11Eu4(UO2)2(P2O7)6(PO4)	6	UO3, Eu2O3	CsPO3/Cs4P2O7	600 °C (2 d), 850 °C (10 d)	720 °C (1 °C/h)	orange			1997	Pobedina, A. B.; Ilyukhin, A. B., Synthesis, properties, and structure of Cs11Eu4(UO2)2(P2O7)6(PO4)., Zh. Neorg. Khim. 1997, 42, 1120-1124.
(Nd0.38U0.62)(PO3)4	4	UO2(NO3)2∙6H2O, Nd(NO3)3∙6H2O, Na2CO3	conc. H3PO4	500 °C (no dwell)	RT (naturally)	green	Platinum	water	2015	Yu, N.; Klepov, V. V.; Neumeier, S.; Depmeier, W.; Bosbach, D.; Suleimanov, E. V.; Alekseev, E. V., Further Insight into Uranium and Thorium Metaphosphate Chemistry and the Effect of Nd Incorporation into Uranium(IV) Metaphosphate : Actinide Metaphosphate Chemistry, Eur. J. Inorg. Chem. 2015, 2015, 1562-1568.
Rb2(UO2)(P2O7)	6	Rb2(UO2)(P2O7)	Rb4P2O7	>1220 °C	997 °C			5% soln H2O2 and Na2CO3	1981	Linde, S. A.; Gorbunova, Y. E.; Lavrov, A. V.; Pobedina, A. B., Synthesis and structure of crystals of uranyl pyrophosphates M2UP2O7 (M= Rb OR Cs), Izv. Akad. Nauk SSSR, Neorg. Mater. 1981, 17, 1062-1066.
Cs2(UO2)(P2O7)	6	Cs2(UO2)(P2O7)	CsCl	> 827 °C	677 °C			5% soln H2O2 and Na2CO3	1981	Linde, S. A.; Gorbunova, Y. E.; Lavrov, A. V.; Pobedina, A. B., Synthesis and structure of crystals of uranyl pyrophosphates M2UP2O7 (M= Rb OR Cs), Izv. Akad. Nauk SSSR, Neorg. Mater. 1981, 17, 1062-1066.
(UO2)2P6O17	6	UO3	Polyphosphoric acid	400-420 °C					1981	Gorbunova, Y. E.; Linde, S.; Lavrov, A., New type of high-polymeric anion [P6O17]3∞4- in the structure of uranyl ultraphosphate (UO2)2P6O17, Zh. Neorg. Khim. 1981, 26, 713-717.
Rb2((UO2)3(P2O7)(P4O12))	6	UO2(NO3)2, RbNO3	P2O5	820 °C (no dwell)	50 °C (7 °C/h)	greenish-yellow	platinum		2009	Alekseev, E. V.; Krivovichev, S. V.; Depmeier, W., Rubidium uranyl phosphates and arsenates with polymeric tetrahedral anions: Syntheses and structures of Rb4[(UO2)6(P2O7)4(H2O)], Rb2[(UO2)3(P2O7)(P4O12)] and Rb[(UO2)2(As3O10)], J. Solid State Chem. 2009, 182, 2074-2080.
CsU2(PO4)3	4	UP2, Se	CsCl	1000 °C (192 h), 950 °C (192 h)	950 °C (2.1 °C/h), 550 °C (3.3 °C/h), RT (21.9 °C/h)	blue-purple	Silica	water	2012	Oh, G. N.; Ringe, E.; Van Duyne, R. P.; Ibers, J. A., Synthesis, structure, and optical properties of CsU2(PO4)3, J. Solid State Chem. 2012, 185, 124-129.
U(PO3)4	4	UO2(NO3)2∙6H2O, Nd(NO3)3∙6H2O, Na2CO3	conc. H3PO4	500 °C (no dwell)	RT (naturally)	green	Platinum	water	2015	Yu, N.; Klepov, V. V.; Neumeier, S.; Depmeier, W.; Bosbach, D.; Suleimanov, E. V.; Alekseev, E. V., Further Insight into Uranium and Thorium Metaphosphate Chemistry and the Effect of Nd Incorporation into Uranium(IV) Metaphosphate : Actinide Metaphosphate Chemistry, Eur. J. Inorg. Chem. 2015, 2015, 1562-1568.
U(P4O12)	4	U3O8	conc. H3PO4	850 °C (5 h)	RT (naturally)	green	Porcelain		2015	Yu, N.; Klepov, V. V.; Neumeier, S.; Depmeier, W.; Bosbach, D.; Suleimanov, E. V.; Alekseev, E. V., Further Insight into Uranium and Thorium Metaphosphate Chemistry and the Effect of Nd Incorporation into Uranium(IV) Metaphosphate : Actinide Metaphosphate Chemistry, Eur. J. Inorg. Chem. 2015, 2015, 1562-1568.
Arsenates
Ag6[(UO2)2(As2O7)(As4O13)]	6	UO2(NO3)2, AgNO3	As2O5	780 °C (no dwell)	50 °C (7 °C/h)	greenish-yellow	platinum		2009	Alekseev, E. V.; Krivovichev, S. V.; Depmeier, W., Novel layered uranyl arsenates, Ag6[(UO2)2(As2O7)(As4O13)] and AI6[(UO2)2(AsO4)2(As2O7)] (AI–Ag and Na): first observation of a linear As4O136− anion and structure type evolution, J. Mater. Chem. 2009, 19, 2583-2587.
Ag6[(UO2)2(AsO4)2(As2O7)]	6	UO2(NO3)2, AgNO3	As2O5	780 °C (no dwell)	50 °C (7 °C/h)	greenish-yellow	platinum		2009	Alekseev, E. V.; Krivovichev, S. V.; Depmeier, W., Novel layered uranyl arsenates, Ag6[(UO2)2(As2O7)(As4O13)] and AI6[(UO2)2(AsO4)2(As2O7)] (AI–Ag and Na): first observation of a linear As4O136− anion and structure type evolution, J. Mater. Chem. 2009, 19, 2583-2587.
Na6[(UO2)2(AsO4)2(As2O7)]	6	UO2(NO3)2, NaNO3	As2O5	780 °C (no dwell)	50 °C (7 °C/h)	greenish-yellow	platinum		2009	Alekseev, E. V.; Krivovichev, S. V.; Depmeier, W., Novel layered uranyl arsenates, Ag6[(UO2)2(As2O7)(As4O13)] and AI6[(UO2)2(AsO4)2(As2O7)] (AI–Ag and Na): first observation of a linear As4O136− anion and structure type evolution, J. Mater. Chem. 2009, 19, 2583-2587.
Li5((UO2)13(AsO4)9(As2O7))	6	UO2(NO3)2, Li2CO3	As2O5	820 °C (no dwell)	50 °C (5 °C/h)	dark orange	platinum		2009	Alekseev, E. V.; Krivovichev, S. V.; Depmeier, W., Crystal chemistry of anhydrous Li uranyl phosphates and arsenates. II. Polymorphism and structure topology: Synthesis and crystal structures of a-Li[(UO2)(PO4)], a-Li[(UO2)(AsO4)], b-Li[(UO2)(AsO4)] and Li2[(UO2)3(P2O7)2], J. Solid State Chem. 2009, 182, 2977-2984.
Li((UO2)4(AsO4)3)	6	UO2(NO3)2, Li2CO3	As2O5	820 °C (no dwell)	50 °C (5 °C/h)	dark orange	platinum		2009	Alekseev, E. V.; Krivovichev, S. V.; Depmeier, W., Crystal chemistry of anhydrous Li uranyl phosphates and arsenates. II. Polymorphism and structure topology: Synthesis and crystal structures of a-Li[(UO2)(PO4)], a-Li[(UO2)(AsO4)], b-Li[(UO2)(AsO4)] and Li2[(UO2)3(P2O7)2], J. Solid State Chem. 2009, 182, 2977-2984.
Li3((UO2)7(AsO4)5O)	6	UO2(NO3)2, Li2CO3	As2O5	820 °C (no dwell)	50 °C (5 °C/h)	dark orange	platinum		2009	Alekseev, E. V.; Krivovichev, S. V.; Depmeier, W., Crystal chemistry of anhydrous Li uranyl phosphates and arsenates. II. Polymorphism and structure topology: Synthesis and crystal structures of a-Li[(UO2)(PO4)], a-Li[(UO2)(AsO4)], b-Li[(UO2)(AsO4)] and Li2[(UO2)3(P2O7)2], J. Solid State Chem. 2009, 182, 2977-2984.
Ba4((UO2)2(As2O7)3)	6	UO2(NO3)2, Ba(NO3)2	As2O5	850 °C (no dwell)	50 °C (7 °C/h)	green-yellow	Pt crucibles		2011	Alekseev, E. V.; Krivovichev, S. V.; Depmeier, W., Structural Complexity of Barium Uranyl Arsenates: Synthesis, Structure, and Topology of Ba4[(UO2)2(As2O7)3], Ba3[(UO2)2(AsO4)2(As2O7)], and Ba5Ca[(UO2)8(AsO4)4O8], Cryst. Growth Des. 2011, 11, 3295-3300.
Ba3((UO2)2(AsO4)2(As2O7))	6	UO2(NO3)2, Ba(NO3)2	As2O5	850 °C (no dwell)	50 °C (7 °C/h)	green-yellow	Pt crucibles		2011	Alekseev, E. V.; Krivovichev, S. V.; Depmeier, W., Structural Complexity of Barium Uranyl Arsenates: Synthesis, Structure, and Topology of Ba4[(UO2)2(As2O7)3], Ba3[(UO2)2(AsO4)2(As2O7)], and Ba5Ca[(UO2)8(AsO4)4O8], Cryst. Growth Des. 2011, 11, 3295-3300.
Ba5Ca((UO2)8(AsO4)4O8)	6	UO2(NO3)2, Ba(NO3)2, CaCO3	As2O5	1150 °C (no dwell)	50 °C (7 °C/h)	green-yellow	platinum		2011	Alekseev, E. V.; Krivovichev, S. V.; Depmeier, W., Structural Complexity of Barium Uranyl Arsenates: Synthesis, Structure, and Topology of Ba4[(UO2)2(As2O7)3], Ba3[(UO2)2(AsO4)2(As2O7)], and Ba5Ca[(UO2)8(AsO4)4O8], Cryst. Growth Des. 2011, 11, 3295-3300.
K2((UO2)As2O7)	6	UO2(NO3)2, K2CO3	As2O5	800 °C (no dwell)	60 °C (5 °C/h)	yellow	platinum		2007	Alekseev, E. V.; Krivovichev, S. V.; Depmeier, W., K2[(UO2)As2O7] — the First Uranium Polyarsenate, Z. Anorg. Allg. Chem. 2007, 633, 1125-1126.
Li((UO2)(AsO4))	6	UO2(NO3)2, Li2CO3	As2O5	820 °C (no dwell)	50 °C (5 °C/h)	green-yellow	platinum		2008	Alekseev, E. V.; Krivovichev, S. V.; Malcherek, T.; Depmeier, W., Crystal chemistry of anhydrous Li uranyl phosphates and arsenates. I. Polymorphism and structure topology: Synthesis and crystal structures of a-Li[(UO2)(PO4)], a-Li[(UO2)(AsO4)], b-Li[(UO2)(AsO4)] and Li2[(UO2)3(P2O7)2], J. Solid State Chem. 2008, 181, 3010-3015.
Rb((UO2)2(As3O10))	6	UO2(NO3)2, RbNO3	As2O5	820 °C (no dwell)	50 °C (7 °C/h)	greenish-yellow	platinum		2009	Alekseev, E. V.; Krivovichev, S. V.; Depmeier, W., Rubidium uranyl phosphates and arsenates with polymeric tetrahedral anions: Syntheses and structures of Rb4[(UO2)6(P2O7)4(H2O)], Rb2[(UO2)3(P2O7)(P4O12)] and Rb[(UO2)2(As3O10)], J. Solid State Chem. 2009, 182, 2074-2080.
Ba2[UO2(AsO4)2]	6	UO2(NO3)2∙6H2O, Ba(NO3)2, NH4H2AsO4	B2O3	1000 °C (5 h)	300 °C (5 °C/h)	green	Platinum		2014	Wu, S.; Kowalski, P. M.; Yu, N.; Malcherek, T.; Depmeier, W.; Bosbach, D.; Wang, S.; Suleimanov, E. V.; Albrecht-Schmitt, T. E.; Alekseev, E. V., Highly Distorted Uranyl Ion Coordination and One/Two-Dimensional Structural Relationship in the Ba2[UO2(TO4)2] (T = P, As) System: An Experimental and Computational Study, Inorg. Chem. 2014/07/21 2014, 53, 7650-7660.
Ba4[(UO2)7(UO4)(AsO4)2O7]	6	UO2(NO3)2∙6H2O, Ba(NO3)2	As2O5	1150 °C (no dwell)	RT (7 °C/h)	red	Platinum		2009	Wu, S.; Ling, J.; Wang, S.; Skanthakumar, S.; Soderholm, L.; Albrecht-Schmitt, T. E.; Alekseev, E. V.; Krivovichev, S. V.; Depmeier, W., Uranium(VI) Adopts a Tetraoxido Core, Eur. J. Inorg. Chem. 2009, 2009, 4039-4042.
Niobates
Cs9((UO2)8O4(NbO5)(Nb2O8)2)	6	U3O8, Nb2O5	Cs2CO3	1400 °C (2 d)	RT (5 °C/h)	yellow	pltainum	methanol	2008	Saad, S.; Obbade, S.; Yagoubi, S.; Renard, C.; Abraham, F., A new uranyl niobate sheet in the cesium uranyl niobate Cs9[(UO2)8O4(NbO5)(Nb2O8)2], J. Solid State Chem. 2008, 181, 741-750.
UTiNb2O10	6	U3O8, Nb2O5, TiO2	H3BO3	1200 °C		black			1969	Chevalier, R.; Gasperin, M., Synthèse en monocristaux et structure crisyalline de l’oxyde UTiNb2O10, C.R. Acad. Sci. C 1969, 268, 1426-1428.
TlNb2U2O11.5	6	U3O8, Nb2O5	Tl2CO3	1150 °C	slow cool	orange	Pt crucible		1987	Gasperin, M., Synthese et structure de trois niobouranates d’ions monovalents: TlNb2U2O11.5, KNbUO6, et RbNbUO6, J. Solid State Chem. 1987, 67, 219-224.
KNbUO6	6	U3O8, Nb2O5	K2CO3	1200 °C	slow cool	orange	Pt crucible		1987	Gasperin, M., Synthese et structure de trois niobouranates d’ions monovalents: TlNb2U2O11.5, KNbUO6, et RbNbUO6, J. Solid State Chem. 1987, 67, 219-224.
RbNbUO6	6	U3O8, Nb2O5	Rb2CO3	1300 °C	slow cool	orange	Pt crucible		1987	Gasperin, M., Synthese et structure de trois niobouranates d’ions monovalents: TlNb2U2O11.5, KNbUO6, et RbNbUO6, J. Solid State Chem. 1987, 67, 219-224.
CsNbUO6	6	U3O8, Nb2O5	Cs2CO3	1200 °C (15 h)		yellow		boiling water	1987	Gasperin, M., Synthèse et structure du niobouranate de césium: CsNbUO6, Acta Crystallogr. C 1987, 43, 404-406.
Nb7.6U2.4Ba5.2K0.8O30	6	U3O8, Nb2O5, BaCO3	K2CO3	1250 °C (15 h)	RT (naturally)	dark brown			1988	Saine, M. C., Synthese et structure d’un bronze oxygene quadratique contenant de l’uranium a la valence six, J. Less-Common Met. 1988, 139, 315-319.
Telurites
K2[(UO2)3(TeO3)2O2]	6	UO3, TeO3	KCl	800 °C (5 d)	RT (29.8 °C/h)	yellow	Silica		2004	Woodward, J. D.; Almond, P. M.; Albrecht-Schmitt, T. E., Synthesis and crystal structures of the layered uranyl tellurites A2[(UO2)3(TeO3)2O2] (A=K, Rb, Cs), J. Solid State Chem. 2004, 177, 3971-3976.
Rb2[(UO2)3(TeO3)2O2]	6	UO3, TeO3	RbCl	800 °C (5 d)	RT (29.8 °C/h)	yellow	Silica		2004	Woodward, J. D.; Almond, P. M.; Albrecht-Schmitt, T. E., Synthesis and crystal structures of the layered uranyl tellurites A2[(UO2)3(TeO3)2O2] (A=K, Rb, Cs), J. Solid State Chem. 2004, 177, 3971-3976.
Cs2[(UO2)3(TeO3)2O2]	6	UO3, TeO3	CsCl	800 °C (5 d)	RT (29.8 °C/h)	yellow	Silica		2004	Woodward, J. D.; Almond, P. M.; Albrecht-Schmitt, T. E., Synthesis and crystal structures of the layered uranyl tellurites A2[(UO2)3(TeO3)2O2] (A=K, Rb, Cs), J. Solid State Chem. 2004, 177, 3971-3976.
Ca2(UO3)(TeO3)2	6	UO2(NO3)2∙6H2O, CaO	H6TeO6	700 °C (10 h)	550 °C (2 °C/h), RT (4.5 °C/h)	yellow	Platinum		2016	Zadoya, A. I.; Siidra, O. I.; Bubnova, R. S.; Nazarchuk, E. V.; Bocharov, S. N., Tellurites of Hexavalent Uranium: First Observation of Polymerized (UO4)2- Tetraoxido Cores, Eur. J. Inorg. Chem. 2016, 2016, 4083-4089.
K2(UO2)2O2(TeO3)	6	UO2(NO3)2∙6H2O, KCl	H6TeO6	700 °C (10 h)	550 °C (2 °C/h), RT (4.5 °C/h)	yellow	Platinum		2016	Zadoya, A. I.; Siidra, O. I.; Bubnova, R. S.; Nazarchuk, E. V.; Bocharov, S. N., Tellurites of Hexavalent Uranium: First Observation of Polymerized (UO4)2- Tetraoxido Cores, Eur. J. Inorg. Chem. 2016, 2016, 4083-4089.
K4[(UO2)5(TeO3)2O5]	6	UO3, TeO3	KCl	800 °C (3 d)	RT (30 °C/h)	yellow	alumina	water	2005	Woodward, J. D.; Albrecht-Schmitt, T. E., Molten salt flux synthesis and structure of the new layered uranyl tellurite, K4[(UO2)5(TeO3)2O5], J. Solid State Chem. 2005, 178, 2922-2926.
Molybdates
Cs2((UO2)O(MoO4))	6	UO2(CH3COO)2, MoO3	Cs2CO3	870 °C (no dwell)	50 °C (5 °C/h)		platinum		2007	Alekseev, E. V.; Krivovichev, S. V.; Armbruster, T.; Depmeier, W.; Suleimanov, E. V.; Chuprunov, E. V.; Golubev, A. V., Dimensional Reduction in Alkali Metal Uranyl Molybdates: Synthesis and Structure of Cs2[(UO2)O(MoO4)], Zeitschrift fuer Anorganische und Allgemeine 2007, 633, 1979-1984.
Li4((UO2)10O10(Mo2O8))	6	UO3, MoO3	Li2CO3	870 °C (no dwell)	RT (5.5 °C/h)	yellow	platinum		2007	Alekseev, E. V.; Krivovichev, S. V.; Malcherek, T.; Depmeier, W., One-Dimensional Array of Two- and Three-Center Cation−Cation Bonds in the Structure of Li4[(UO2)10O10(Mo2O8)], Inorg. Chem. 2007, 46, 8442-8444.
Cs6[(UO2)2(MoO4)3(MoO5)]	6	U3O8, MoO3	Cs2CO3	950 °C (12 h)	RT (5 °C/h)	yellow-orange	Platinum	Hot water/ethanol	2017	Yagoubi, S.; Obbade, S.; Saad, S.; Abraham, F., From ∞1[(UO2)2O(MoO4)4]6− to ∞1[(UO2)2(MoO4)3(MoO5)]6− infinite chains in A6U2Mo4O21 (A= Na, K, Rb, Cs) compounds: Synthesis and crystal structure of Cs6[(UO2)2(MoO4)3(MoO5)], J. Solid State Chem. 2011, 184, 971-981.
𝛽-Cs2[(UO2)2(MoO4)3]	6	UO3	Cs(COOCH3)/MoO3	850 °C (2 h), 650 °C (2h)	650 °C (40 °C/h), 350 °C (6 °C/h), RT (14.8 °C/h)	yellow	Alumina		2011	Krivovichev, S. V.; Cahill, C. L.; Burns, P. C., Syntheses and Crystal Structures of Two Topologically Related Modifications of Cs2[(UO2)2(MoO4)3], Inorg. Chem. 2002, 41, 34-39.
Ag6[(UO2)3O(MoO4)5]	6	UO3	AgNO3/MoO3	650 °C (5 h)	300 °C (7 °C/h), 50 °C 25 °C/h)	orange	Platinum		2002	Krivovichev, S. V.; Burns, P. C., Synthesis and Structure of Ag6[(UO2)3O(MoO4)5]: A Novel Sheet of Triuranyl Clusters and MoO4 Tetrahedra, Inorg. Chem. 2002, 41, 4108-4110.
K2(UO2)2(MoO4)O2	6	U3O8, MoO3	K2CO3	950 °C (60 h)	RT (5 °C/h)	yellow	Pt crucible	ethanol	2003	Obbade, S.; Yagoubi, S.; Dion, C.; Saadi, M.; Abraham, F., Synthesis, crystal structure and electrical characterization of two new potassium uranyl molybdates K2(UO2)2(MoO4)O2 and K8(UO2)8(MoO5)3O6, J. Solid State Chem. 2003, 174, 19-31.
K8(UO2)8(MoO5)3O6	6	U3O8, MoO3	K2CO3	950 °C (60 h)	RT (5 °C/h)	orange	Pt crucible	ethanol	2003	Obbade, S.; Yagoubi, S.; Dion, C.; Saadi, M.; Abraham, F., Synthesis, crystal structure and electrical characterization of two new potassium uranyl molybdates K2(UO2)2(MoO4)O2 and K8(UO2)8(MoO5)3O6, J. Solid State Chem. 2003, 174, 19-31.
K2(UO2)(MoO4)2	6	K2(UO2)(MoO4)2	MoO3	> 795 °C	none			evaporation	1988	Sadikov, G. G.; Krasovskaya, T. I.; Polyakov, Y.; Nikolaev, V. P., Strucural and spectral study of potassium dimolybdatouranylate, Izv. Akad. Nauk SSSR, Neorg. Mater. 1988, 24, 109-115.
Rb2U2MoO10	6	UO3, RbNO3	MoO3	1000 °C (no dwell)	RT (40.6 °C/h)	yellow-green	platinum		2007	Alekseev, E. V.; Suleimano, E. V.; Chuprunov, E. V.; Golubev, A. V.; Fukin, G. K.; Marychev, M. O., Synthesis and Crystal Structure of a New Representative of the Rb2U2MoO10 Uranomolybdate Series, Zh. Neorg. Khim. 2007, 52, 1446-1449.
(Cu,Mn)UMo3O12	4	UO2(CH3COO)2∙2H2O, MnCO3∙H2O, MoO3	MoO3	950 °C (5 d), 700 °C (2 d)	700 °C (50 °C/h), RT	orange-brown	copper		1996	Sedello, O.; Müller-Buschbaum, H., On the crystal structure of (Cu,Mn)UMo3O12, Z. Naturforsch. B. 1996, 51, 450-452.
Tungstates
Bi2(W0.7U0.3)O6	6	U3O8, UO2, Bi2O3, MoO3	K2SO4/Na2SO4	1000 °C (10 h)	750 °C (slow cool)		alumina		2010	Charkin, D. O.; Lebedev, D. N.; Stefanovich, S. Y.; Kazakov, S. M., Uranium substitution for tungsten in the Bi2WO6–Bi2UO6 system: Formation of a broad high-temperature solid solution, Solid State Sci. 2010, 12, 2079-2085.
Bi2(W0.4U0.6)O6	6	U3O8, UO2, Bi2O3, MoO3	K2SO4/Na2SO4	1000 °C (10 h)	750 °C (slow cool)		alumina		2010	Charkin, D. O.; Lebedev, D. N.; Stefanovich, S. Y.; Kazakov, S. M., Uranium substitution for tungsten in the Bi2WO6–Bi2UO6 system: Formation of a broad high-temperature solid solution, Solid State Sci. 2010, 12, 2079-2085.
Rb8((UO2)4(WO4)4(WO5)2)	6	UO2(CH3COO)2, WO3	Rb2CO3	920 °C (no dwell)	250 °C (7 °C/h)		platinum		2006	Alekseev, E. V.; Krivovichev, S. V.; Depmeier, W.; Armbuster, T.; Katzke, H.; Suleimanov, E. V.; Chupranov, E. V., One-dimensional chains in uranyl tungstates: Syntheses and structures of A8[(UO2)4(WO4)4(WO5)2] (A= Rb, Cs) and Rb6[(UO2)2O(WO4)4], J. Solid State Chem. 2006, 179, 2977-2987.
Cs8((UO2)4(WO4)4(WO5)2)	6	UO2(CH3COO)2, WO3	Cs2CO3	920 °C (no dwell)	250 °C (7 °C/h)		platinum		2006	Alekseev, E. V.; Krivovichev, S. V.; Depmeier, W.; Armbuster, T.; Katzke, H.; Suleimanov, E. V.; Chupranov, E. V., One-dimensional chains in uranyl tungstates: Syntheses and structures of A8[(UO2)4(WO4)4(WO5)2] (A= Rb, Cs) and Rb6[(UO2)2O(WO4)4], J. Solid State Chem. 2006, 179, 2977-2987.
Rb6((UO2)2O(WO4)4)	6	UO2(CH3COO)2, WO3	Rb2CO3	920 °C (no dwell)	250 °C (7 °C/h)	yellow	platinum		2006	Alekseev, E. V.; Krivovichev, S. V.; Depmeier, W.; Armbuster, T.; Katzke, H.; Suleimanov, E. V.; Chupranov, E. V., One-dimensional chains in uranyl tungstates: Syntheses and structures of A8[(UO2)4(WO4)4(WO5)2] (A= Rb, Cs) and Rb6[(UO2)2O(WO4)4], J. Solid State Chem. 2006, 179, 2977-2987.
Li4((UO2)2(W2O10))	6	UO2(CH3COO)2, WO3	Li2CO3	920 °C (no dwell)	250 °C (7 °C/h)	red-orange	platinum		2007	Alekseev, E. V.; Krivovichev, S. V.; Depmeier, W.; Malcherek, T.; Suleimanov, E. V.; Chuprunov, E. V., The crystal structure of Li4[(UO2)2(W2O10)] and crystal chemistry of Li uranyl tungstates, Z. Kristallogr. - Cryst. Mater. 2007, 222, 391-395.
Na2Li8[(UO2)11O12(WO5)2]	6	UO2(CH3COO)2∙2H2O, WO3	Li2CO3/Na2CO3	950 °C (40 min)	200 °C (4 °C/h)	orange	-		2006	Alekseev, E. V.; Krivovichev, S. V.; Depmeier, W.; Siidra, O. I.; Karsten, K.; Suleimanov, E. V.; Chuprunov, E. V., Na2Li8[(UO2)11O12(WO5)2]: Three Different Uranyl‐Ion Coordination Geometries and Cation–Cation Interactions, Angew. Chem. 2006, 118, 7391-7393.
Chromates
Cs2(UO2)(CrO4)2	6	UO2(NO3)2∙6H2O, CrO3	CsNO3	270 °C (10 h)	100 °C (3 °C/h), RT (6.8 °C/h)	yellow-green	Platinum		2012	Siidra, O. I.; Nazarchuk, E. V.; Krivovichev, S. V., Syntheses and crystal structures of two novel alkaline uranyl chromates A2(UO2)(CrO4)2 (A=Rb, Cs) with bidentate coordination mode of uranyl ions by chromate anions, J. Solid State Chem. 2012, 187, 286-290.
Rb2(UO2)(CrO4)2	6	UO2(NO3)2∙6H2O, CrO3	RbNO3	270 °C (10 h)	100 °C (3 °C/h), RT (6.8 °C/h)	orange-green	Platinum		2012	Siidra, O. I.; Nazarchuk, E. V.; Krivovichev, S. V., Syntheses and crystal structures of two novel alkaline uranyl chromates A2(UO2)(CrO4)2 (A=Rb, Cs) with bidentate coordination mode of uranyl ions by chromate anions, J. Solid State Chem. 2012, 187, 286-290.
